# Supplementary material
Source: publisher figshare collection journal article supplement (https://springernature.figshare.com/ndownloader/files/15337943)
Supplement: Supplementary file [file 15337943]

## Additional file 1

### Supplementary Figures and Tables

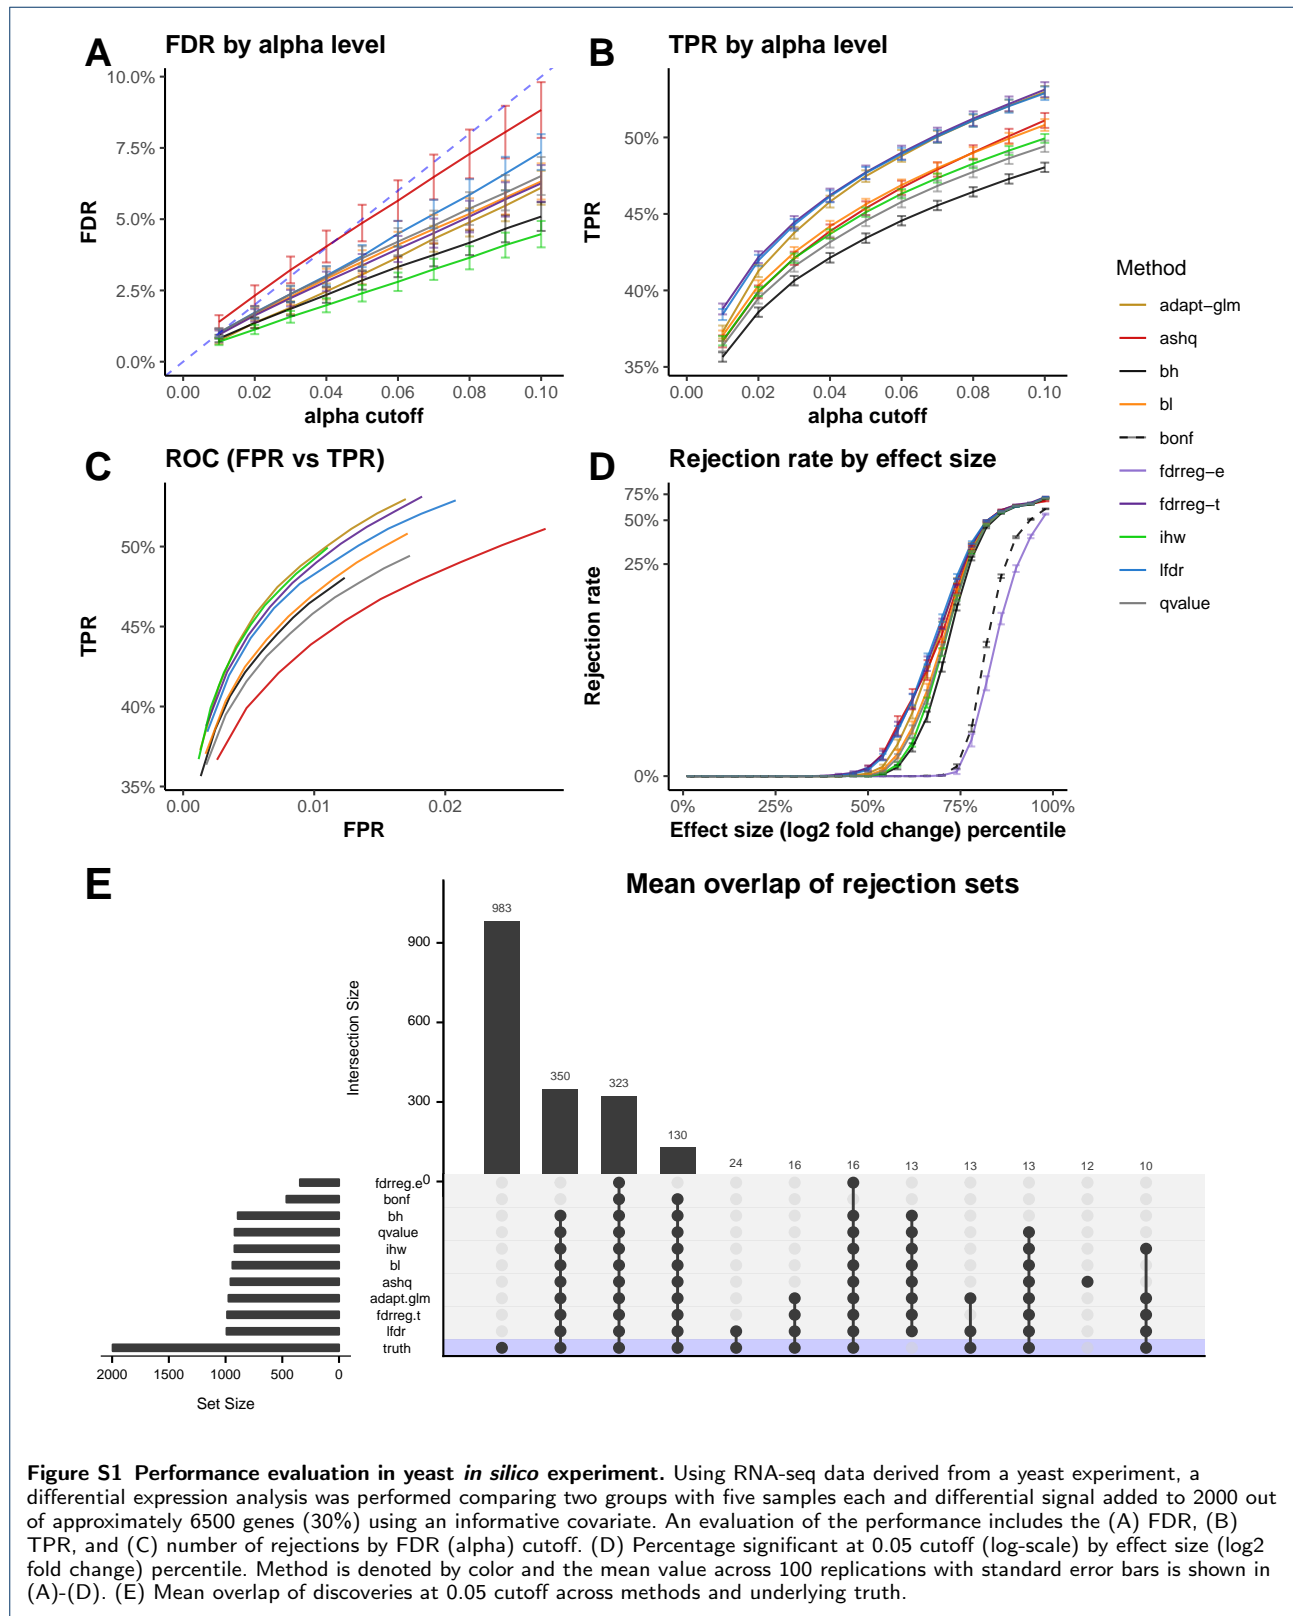

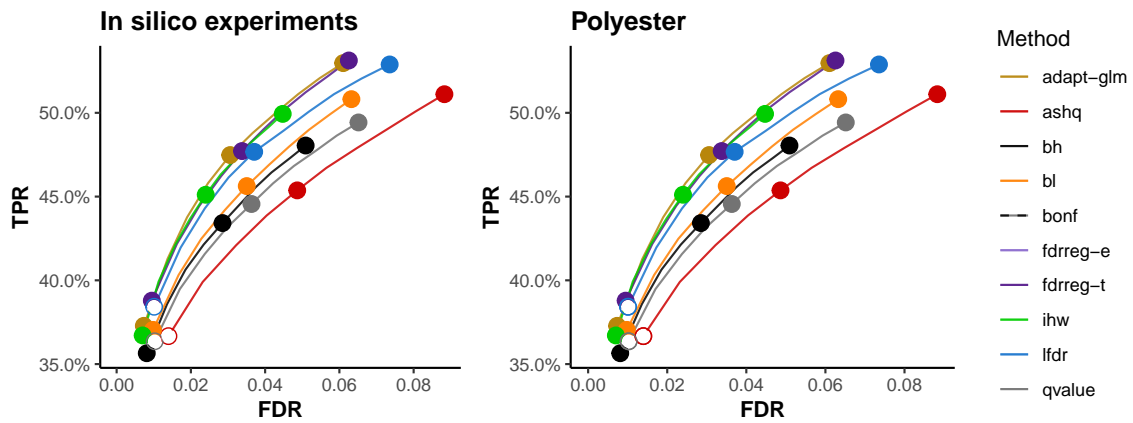

**Figure S2 FDR versus TPR in *in silico* experiments and simulations.** Following the style of the R/Bioconductor *iCOBRA* package [1], the average FDR is plotted on the x-axis against the average TPR on the y-axis for the yeast RNA-seq *in silico* resampling experiments (left) and RNA-seq counts using the *polyester* R/Bioconductor package (right). Three points are included for each line (method) at the following nominal  $\alpha$  values: 0.01, 0.05, and 0.10. A solid point indicates FDR was controlled at the nominal level (on average), whereas an open point indicates that it was not. Averages are taken over all 100 simulation replications.

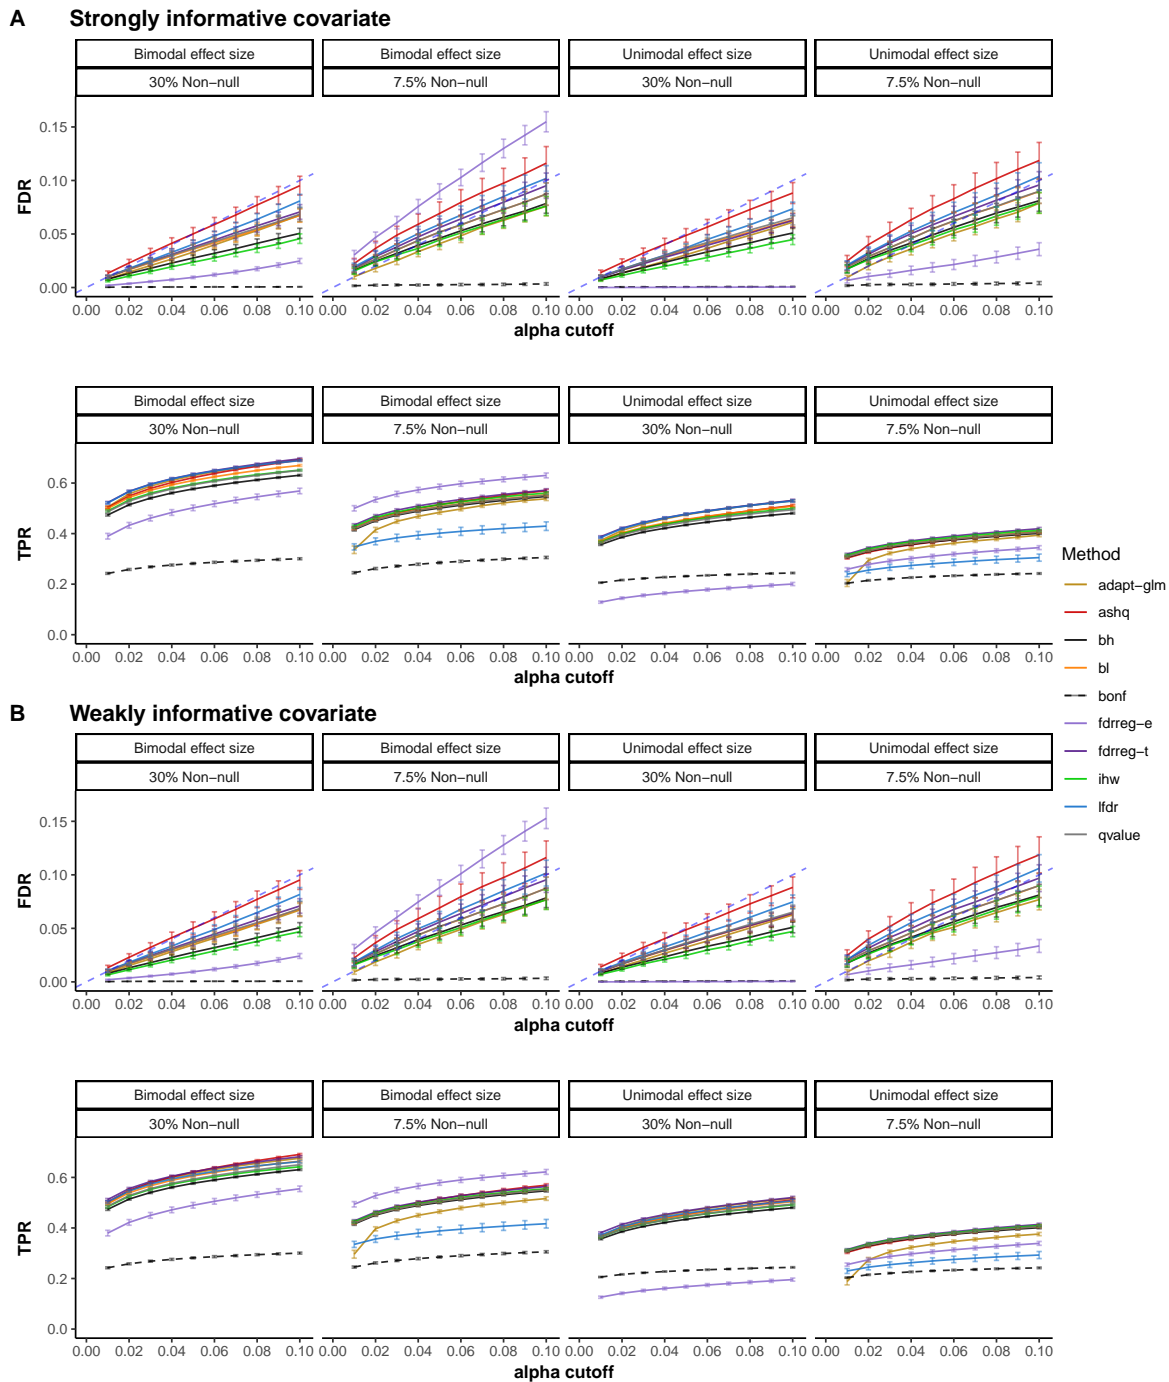

**Figure S3 FDR and TPR under various spike-in settings of yeast *in silico* experiments.** Plots of FDR and TPR across  $\alpha$  cutoff values over 100 replications in the yeast simulation (sample size 5 in each group) by alpha level. Vertical bars depict standard error. Each panel within A and B represents a combination of settings for  $\pi_0$ : 30% (2000) and 7.5% (500) non-null genes (total of 6500 genes), as well as different non-null effect size distributions: bimodal and unimodal. (A) For a *strongly informative covariate*: the informative covariate is equal to the sampling weights for non-null genes. (B) For a *weakly informative covariate*: the informative covariate is equal to the sampling weights for selecting non-null genes plus noise.

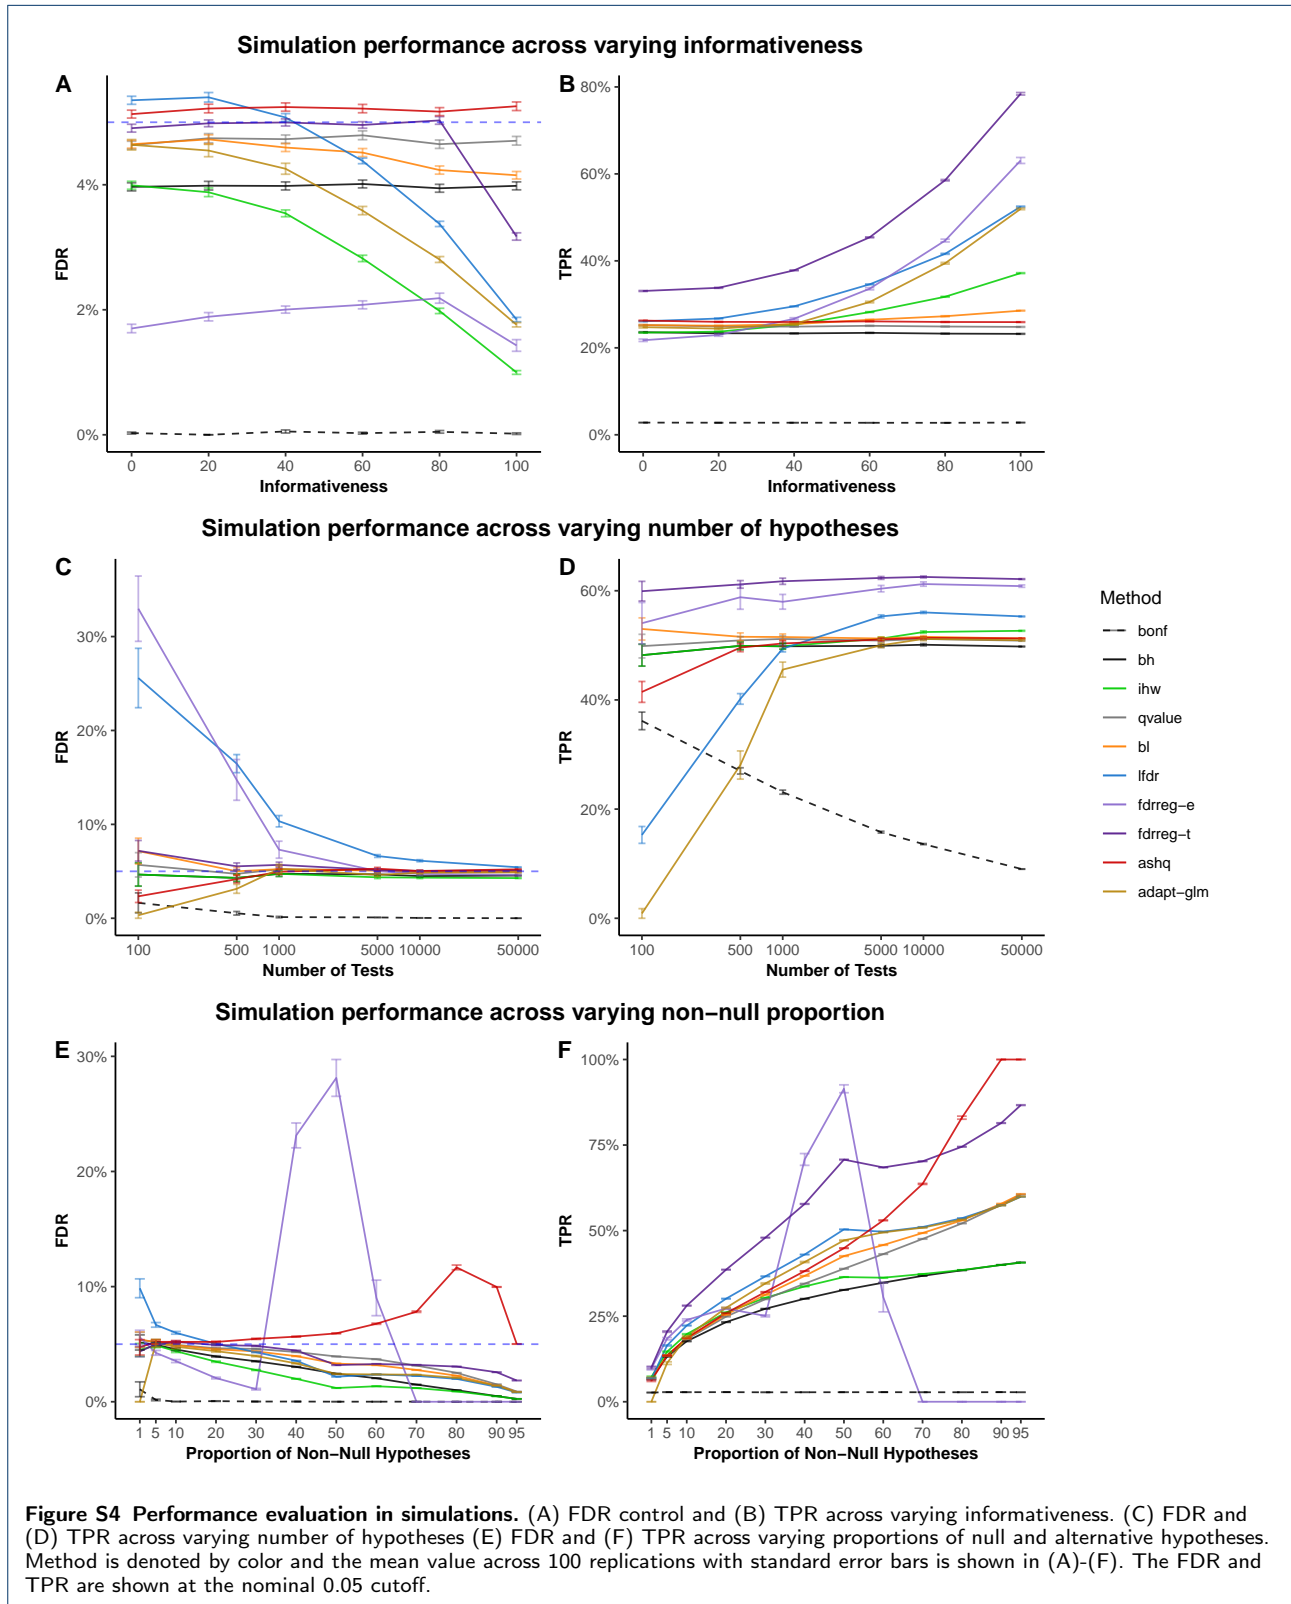

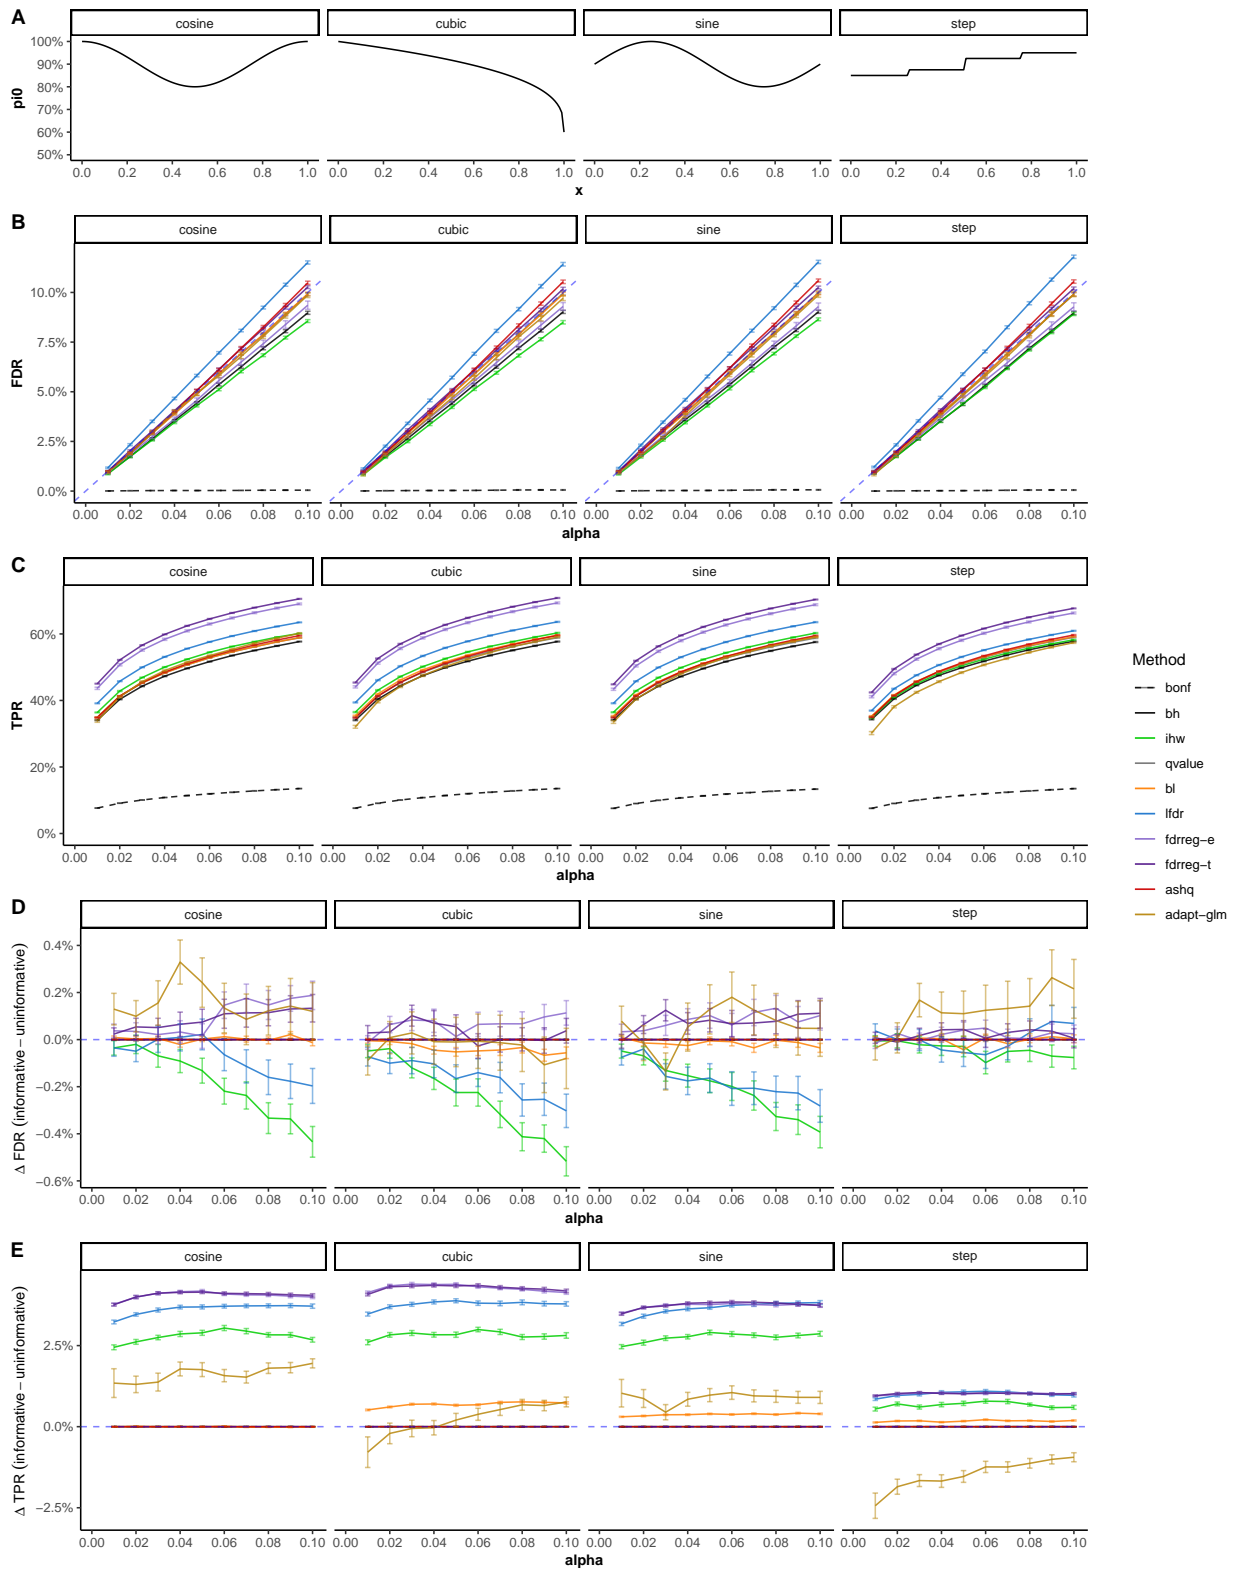

**Figure S5 Simulation performance across informative covariate relationship** (A) Relationship between covariate value,  $x$ , and null proportion of hypotheses,  $\pi_0$ , across simulation settings. (B) FDR and (C) TPR across nominal FDR thresholds between 0.01 and 0.10 are shown for each method across four informative covariates described in the "Methods" section. Differences in (D) FDR and (E) TPR between informative and uninformative covariates are also shown.

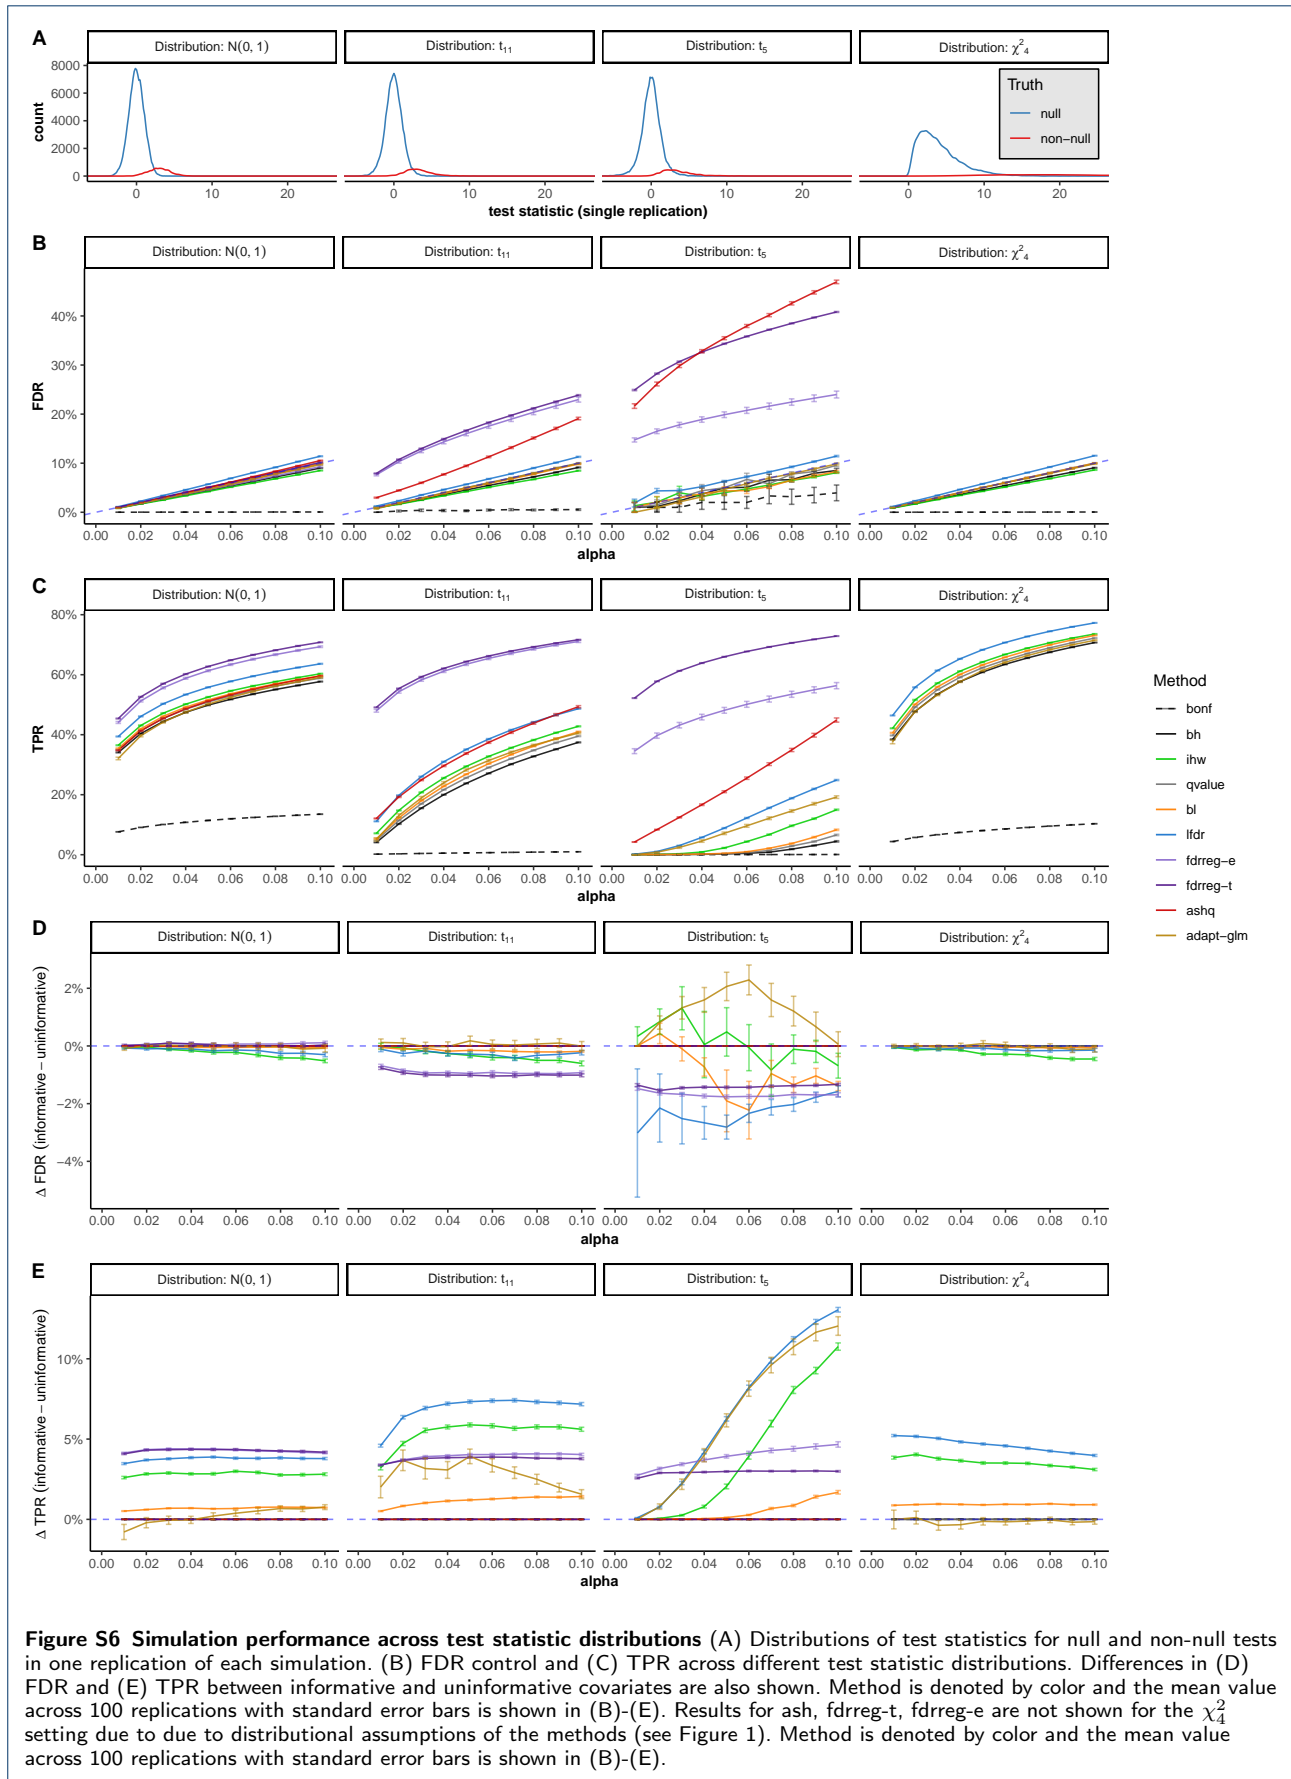

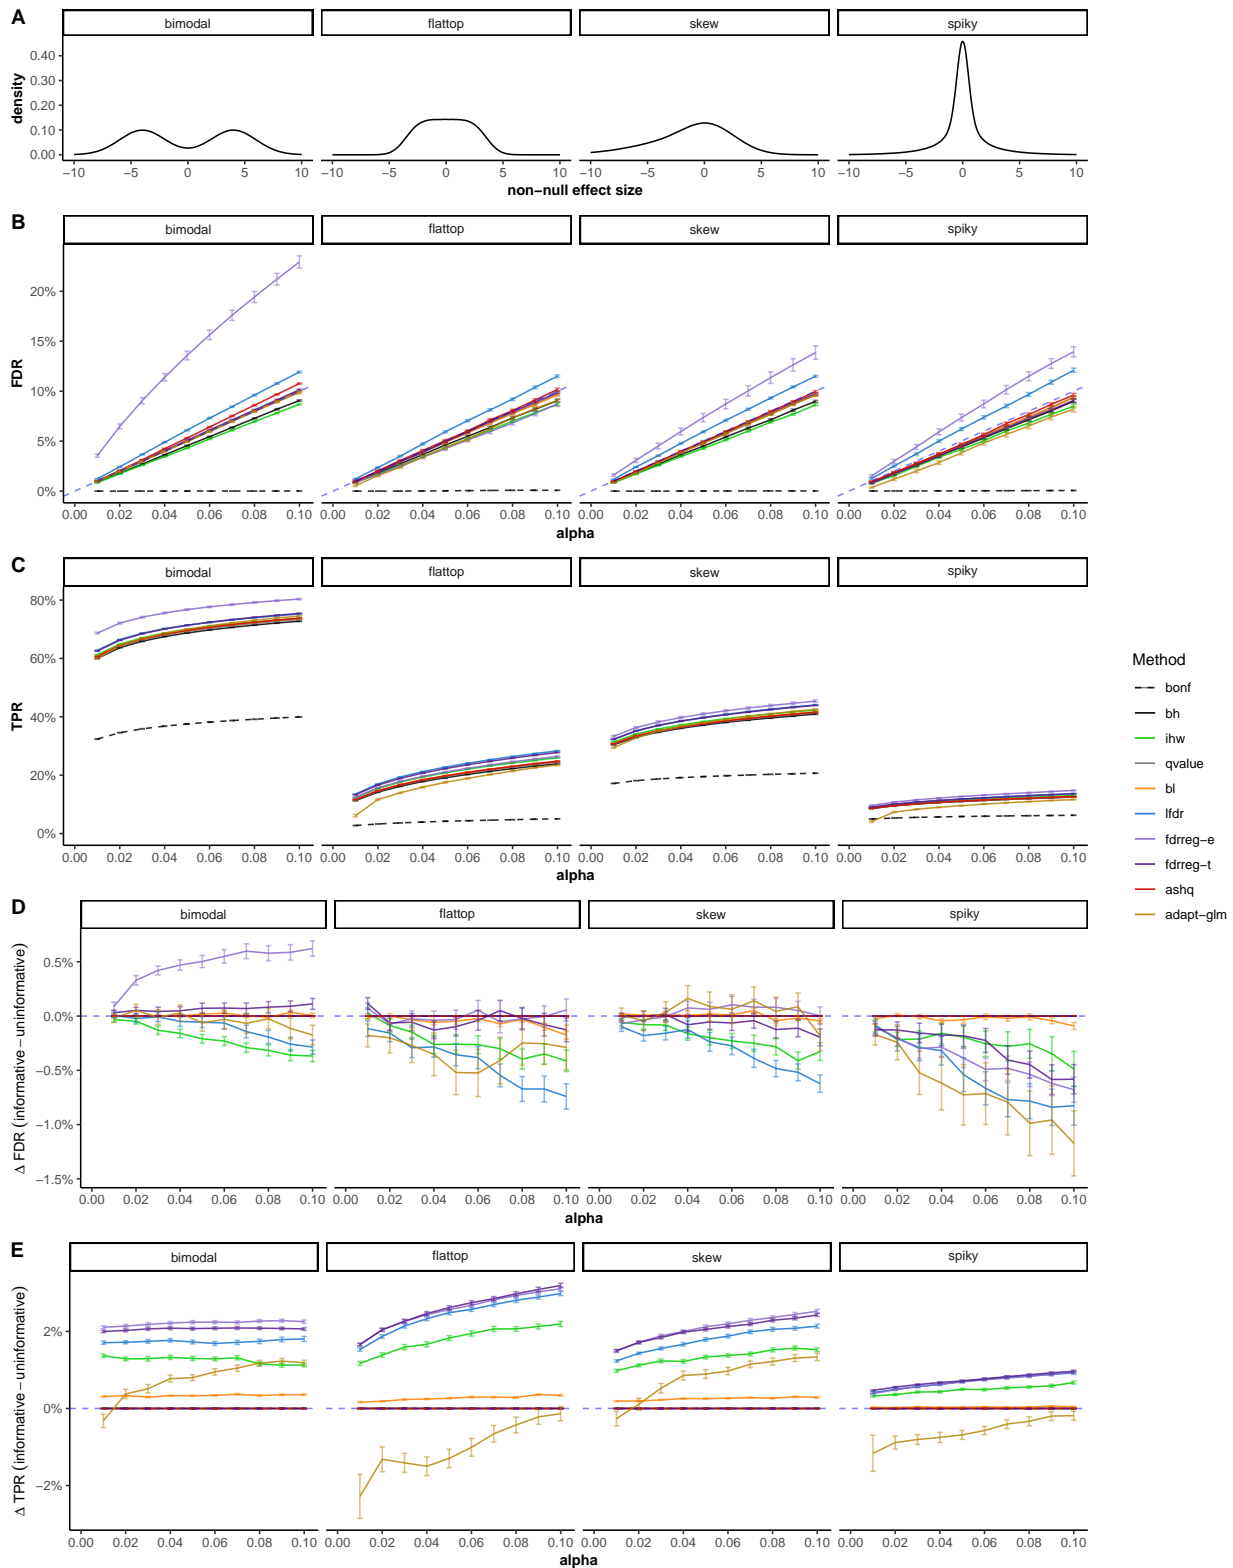

**Figure S7 Simulation performance across effect size distributions** (A) Distributions of effect sizes included in unimodal effect size simulations. (B) FDR and (C) TPR across nominal FDR thresholds between 0.01 and 0.10 are shown for each method across four distributions of the non-null effect sizes presented in [2]: bimodal, flat-top, skew, and spiky. All distributions are unimodal with mode at zero except for the "bimodal" setting. Settings are tested to evaluate the performance of ASH against all other methods under the unimodal assumption. Differences in (D) FDR and (E) TPR between informative and uninformative covariates are also shown. Method is denoted by color and the mean value across 100 replications with standard error bars is shown in (B)-(E).

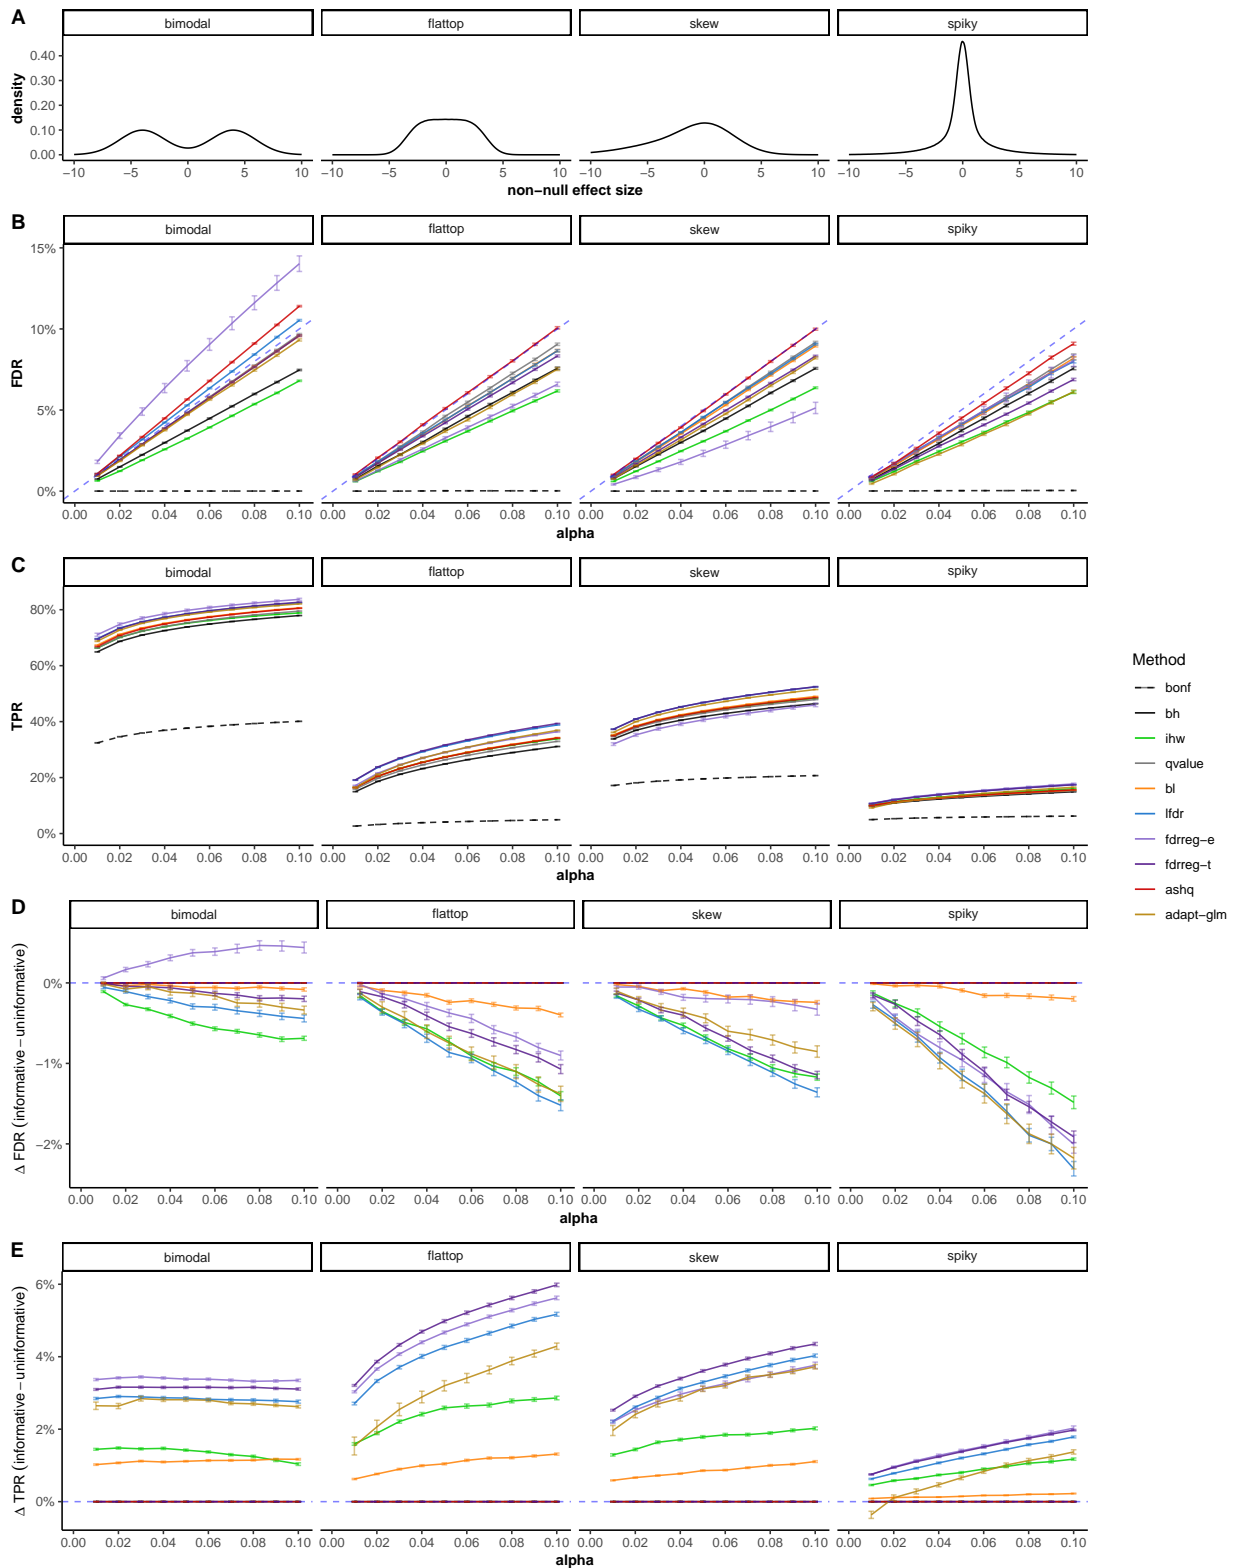

**Figure S8 Simulation performance across unimodal effect size distributions w/ 25% non-null** Same as Figure S7 but with increased proportion of non-null hypotheses. (A) Distributions of effect sizes included in unimodal effect size simulations. (B) FDR and (C) TPR across nominal FDR thresholds between 0.01 and 0.10 are shown for each method across four distributions of the non-null effect sizes. Differences in (D) FDR and (E) TPR between informative and uninformative covariates are also shown. Method is denoted by color and the mean value across 100 replications with standard error bars is shown in (B)-(E).



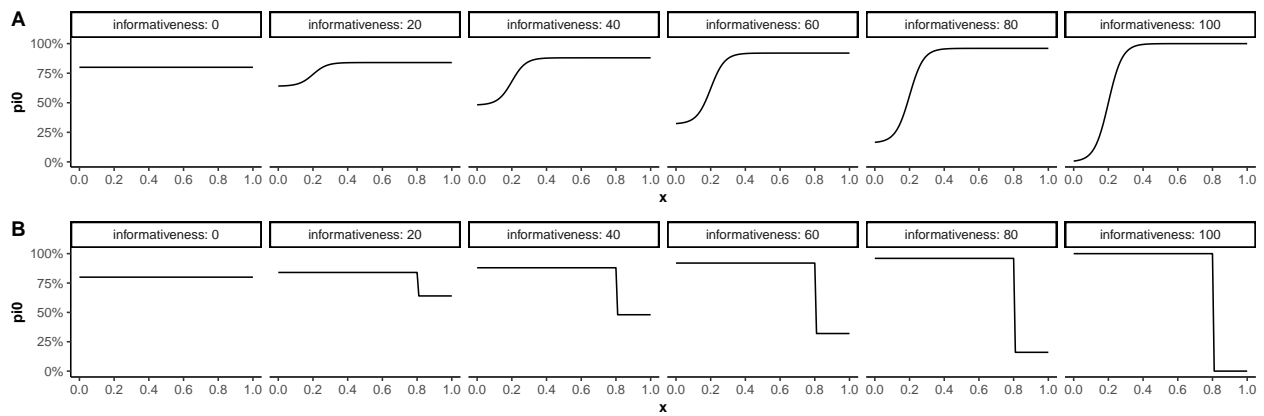

**Figure S9 Informativeness covariate relationships.** Relationship between covariate value,  $x$ , and null proportion of hypotheses,  $\pi_0$ , across several  $\delta$  informativeness values for (A)  $p^{c-info}$  and (B)  $p^{s-info}$ .

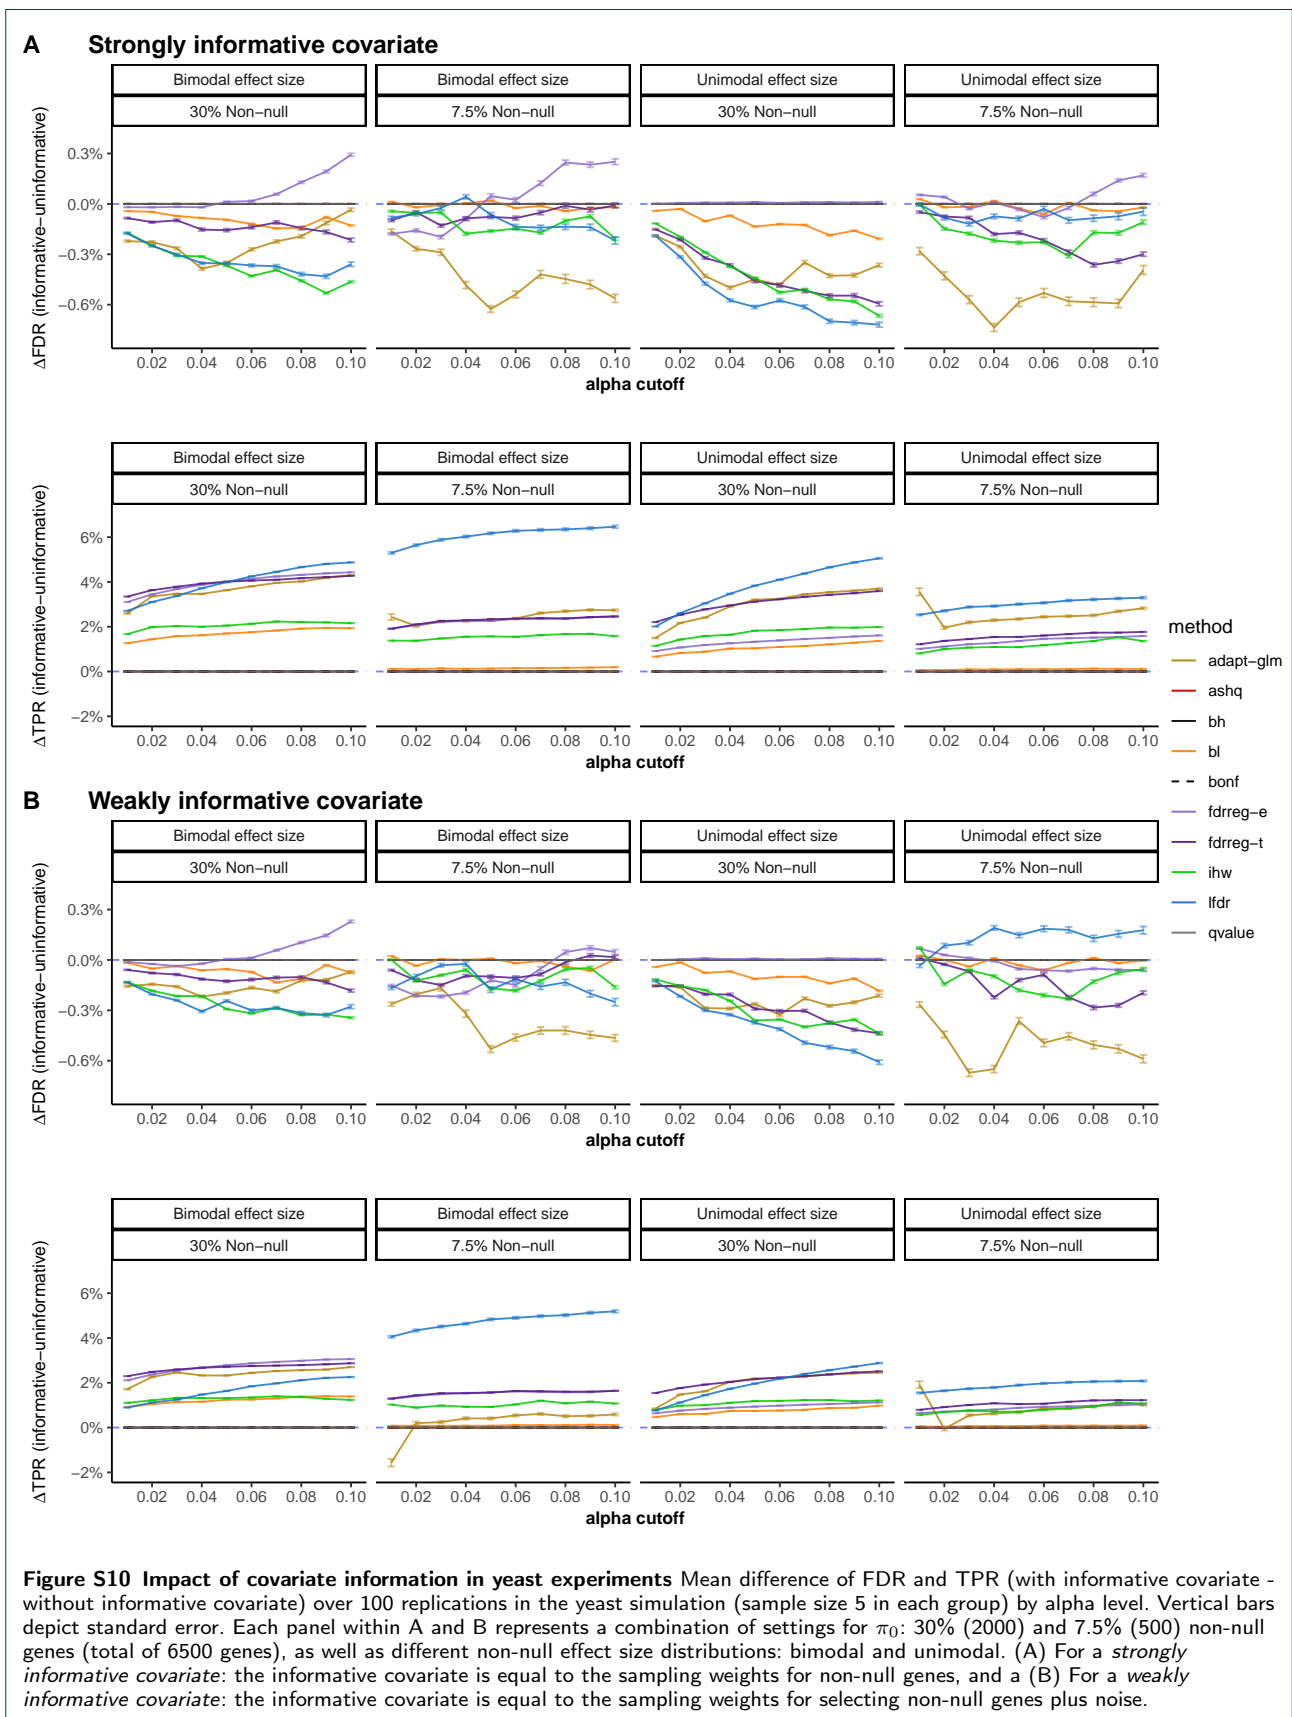

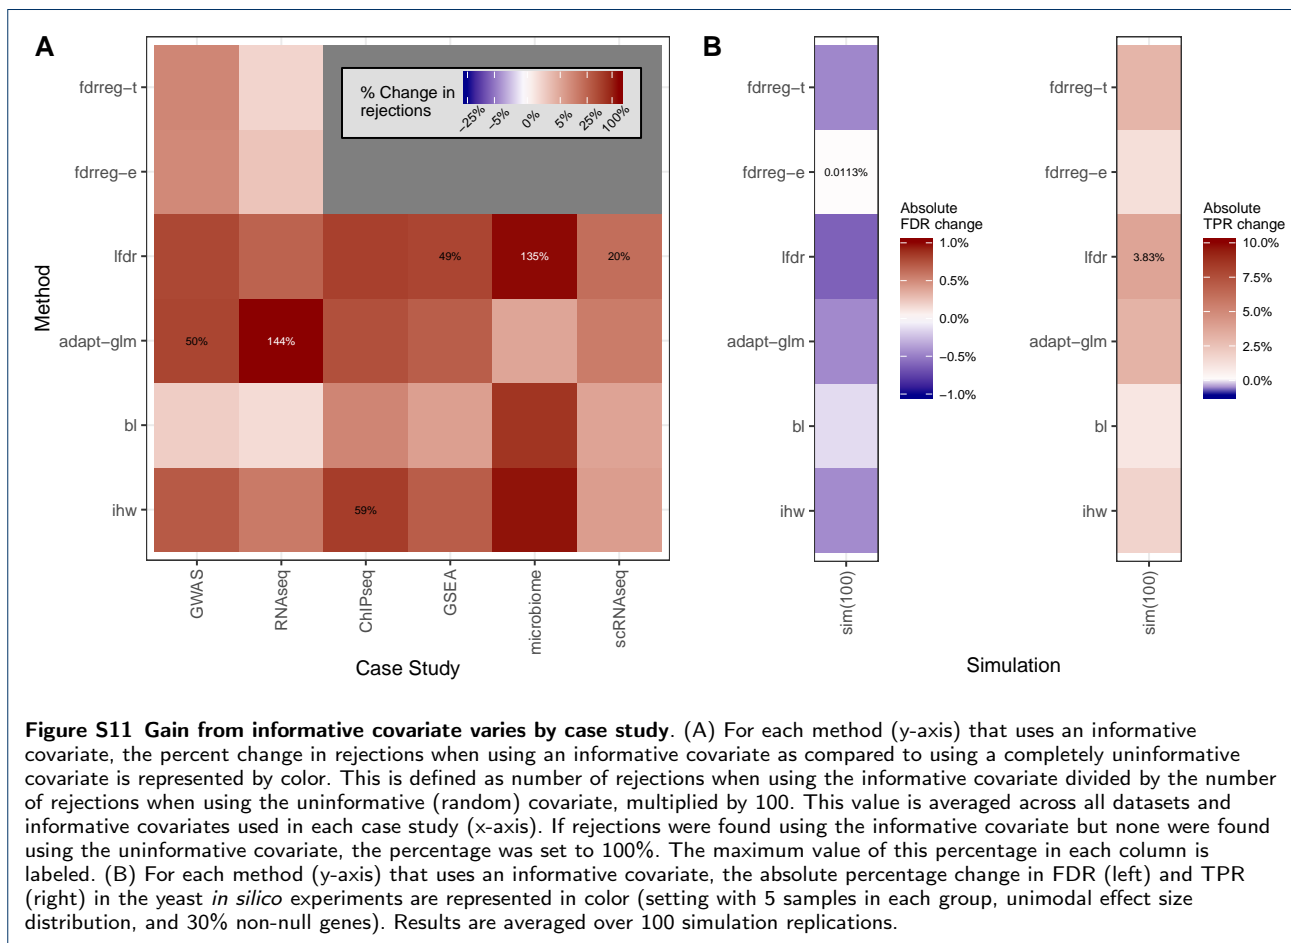

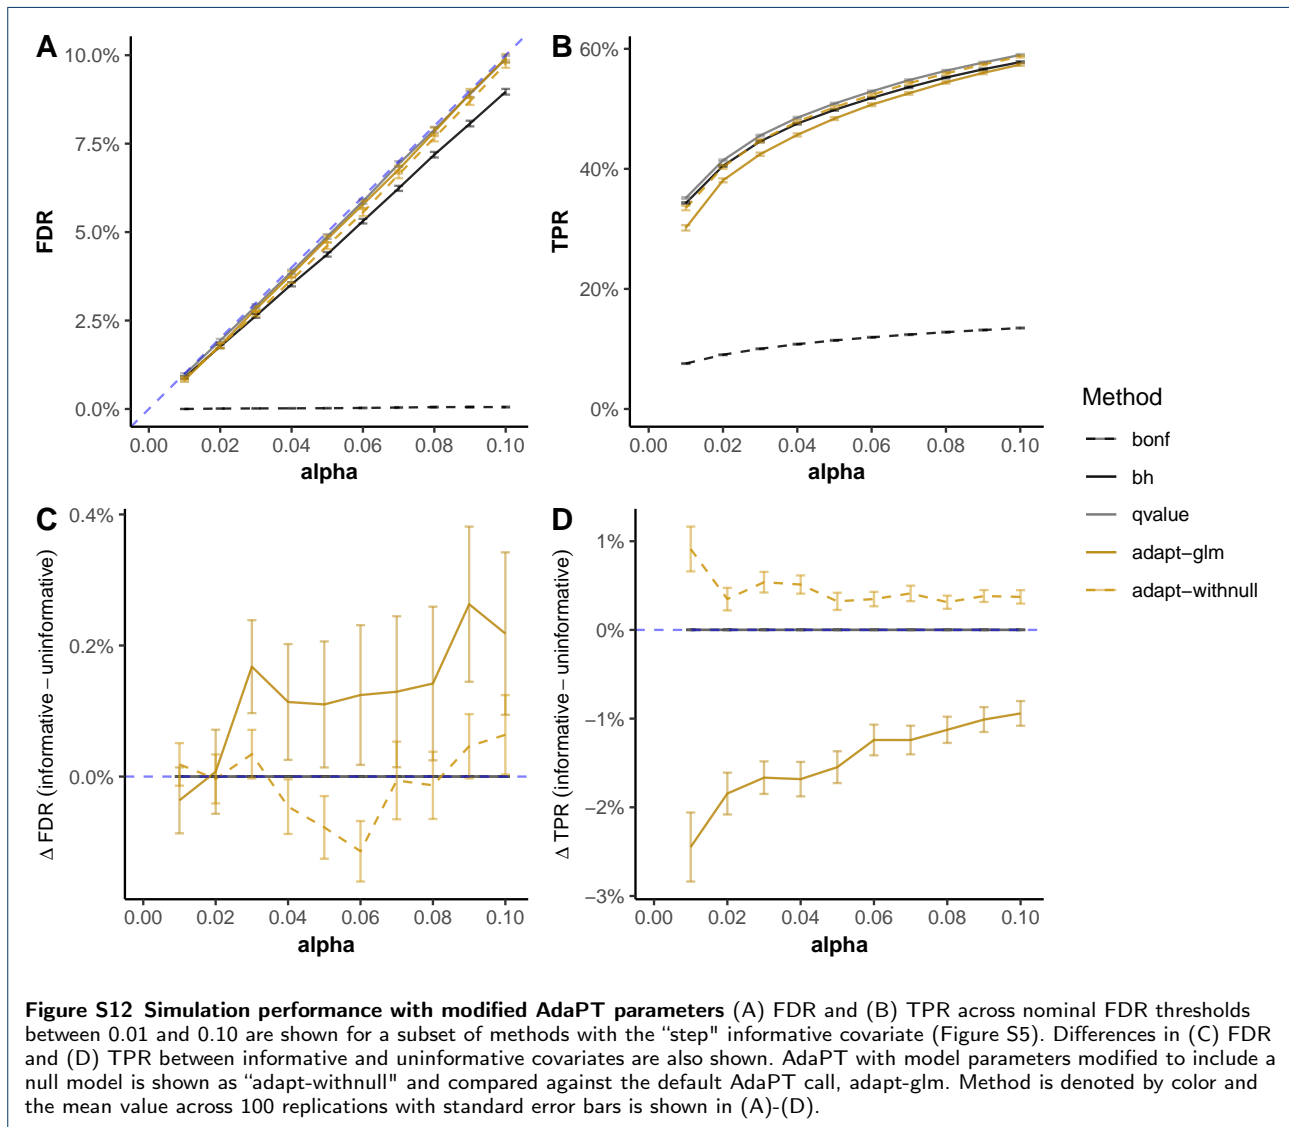

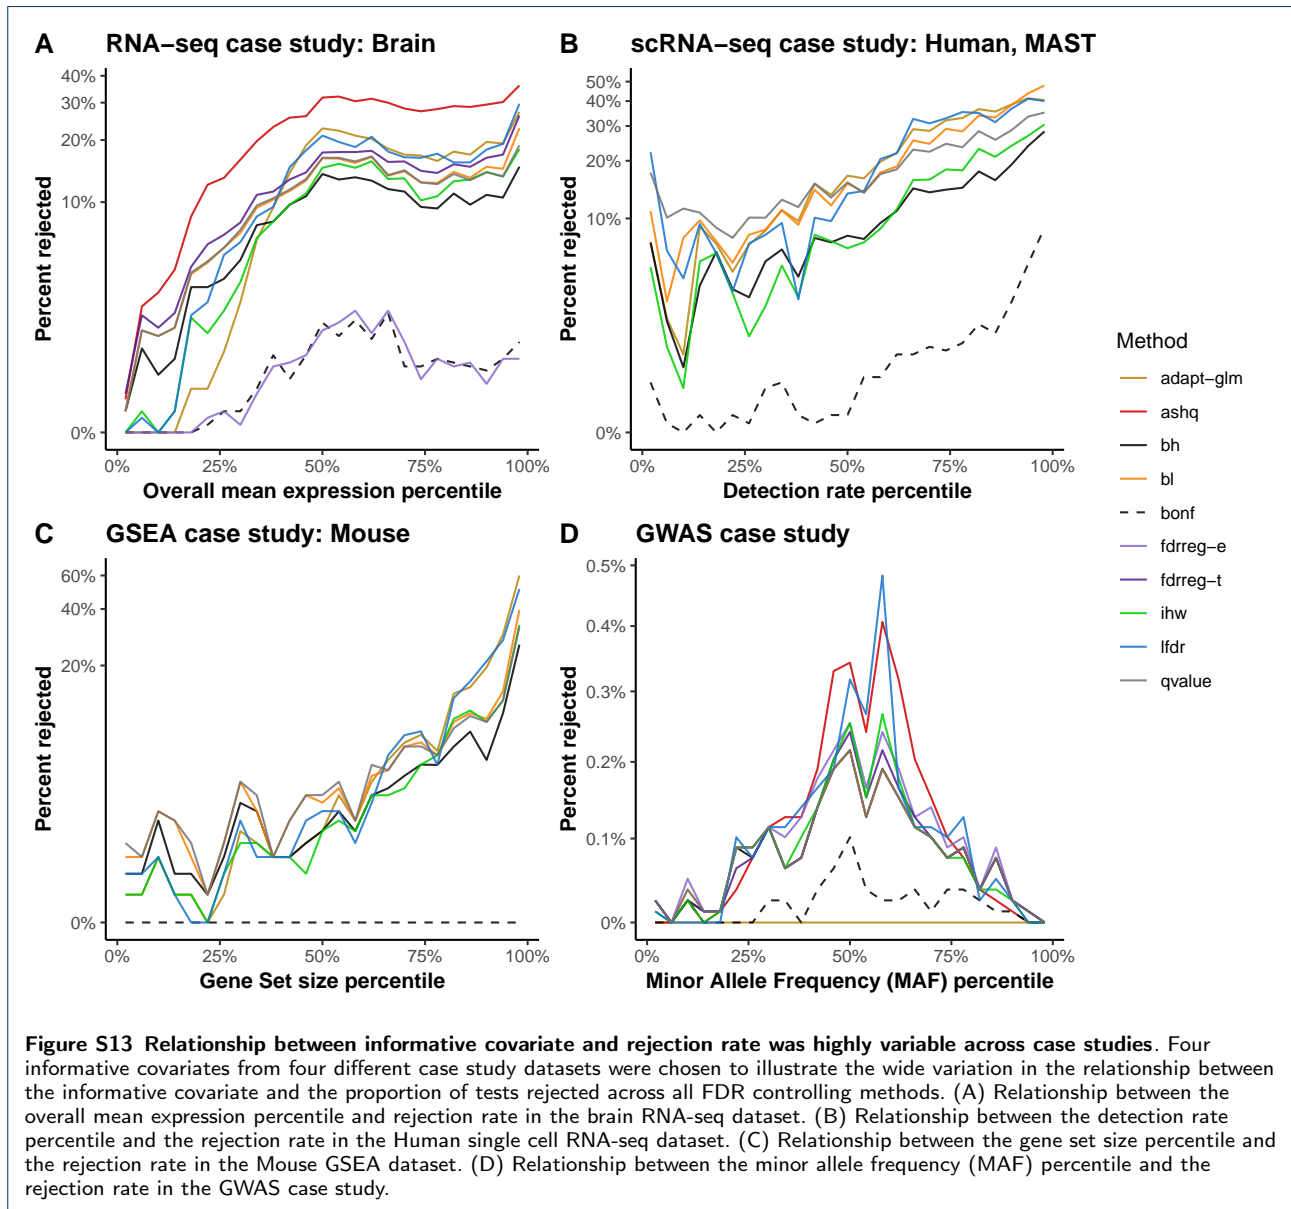

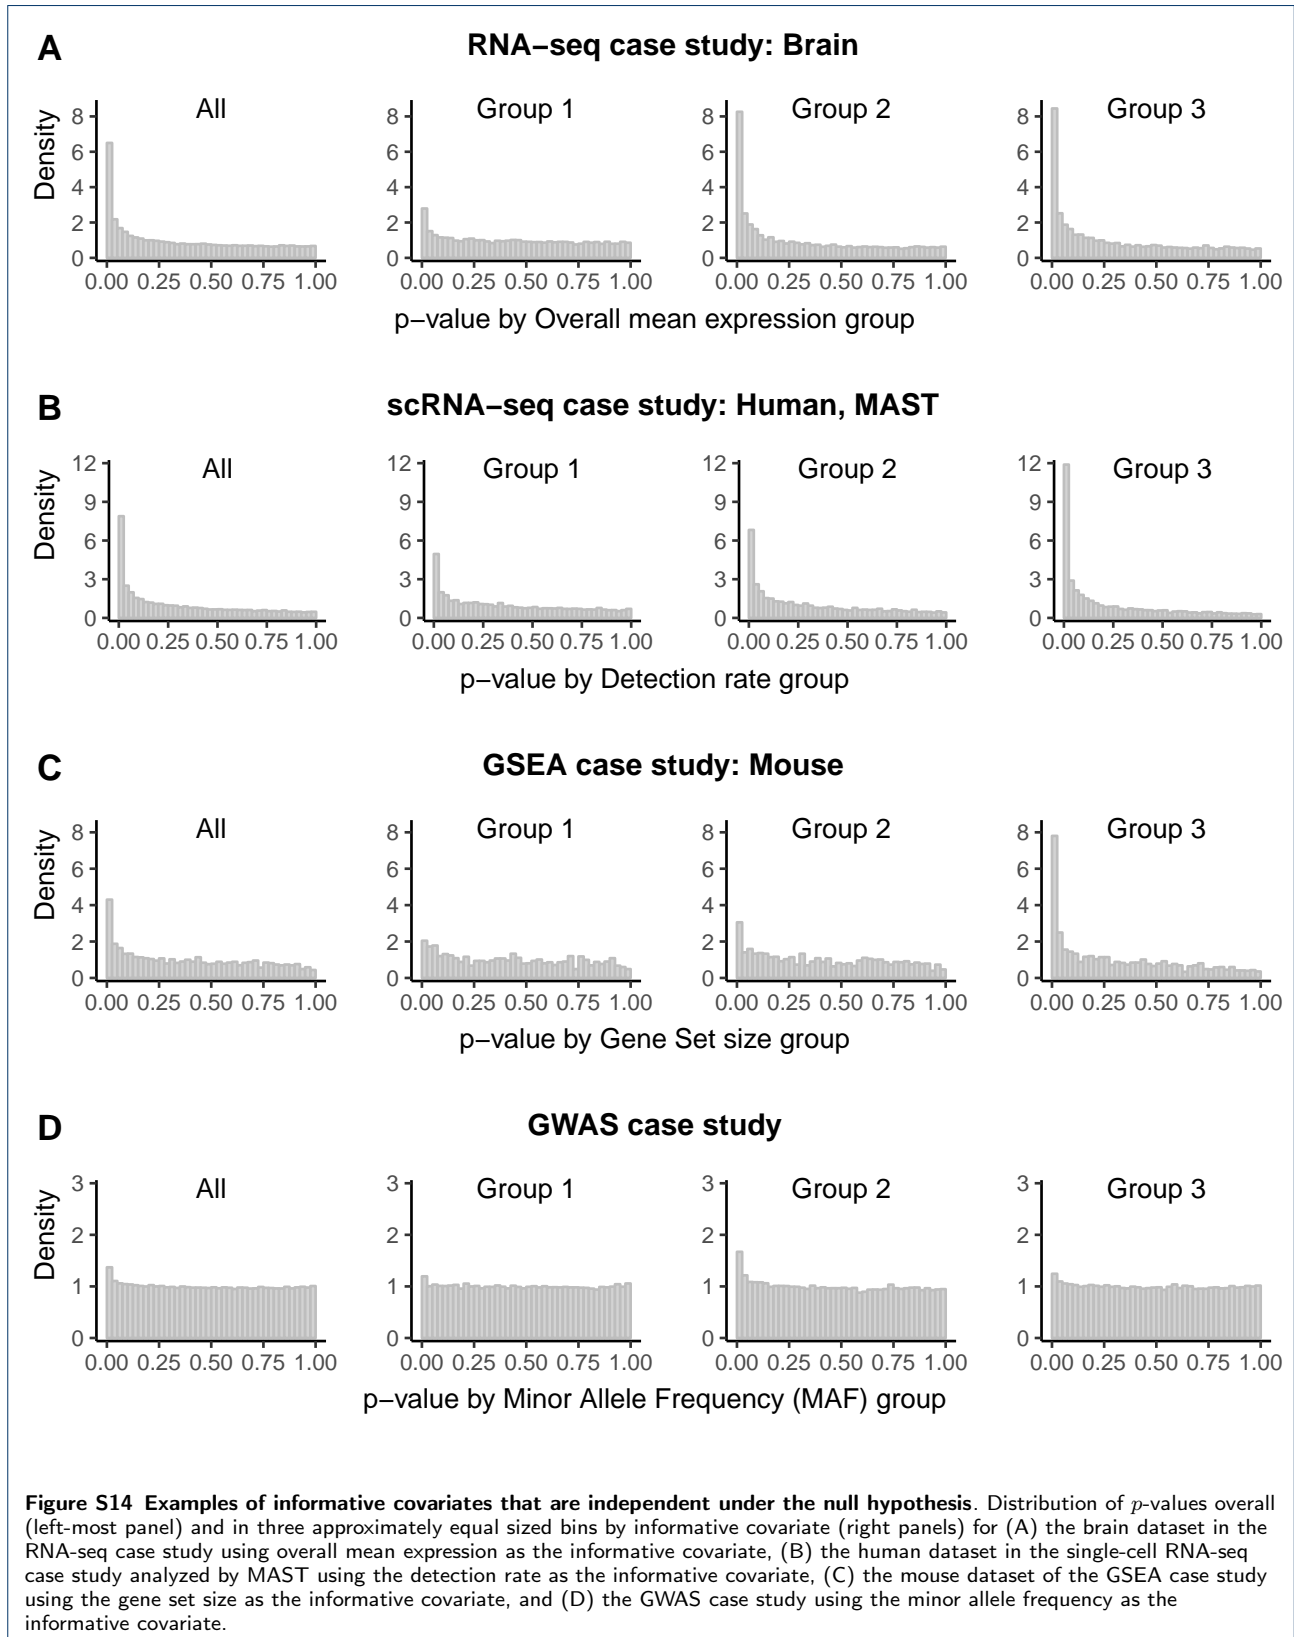

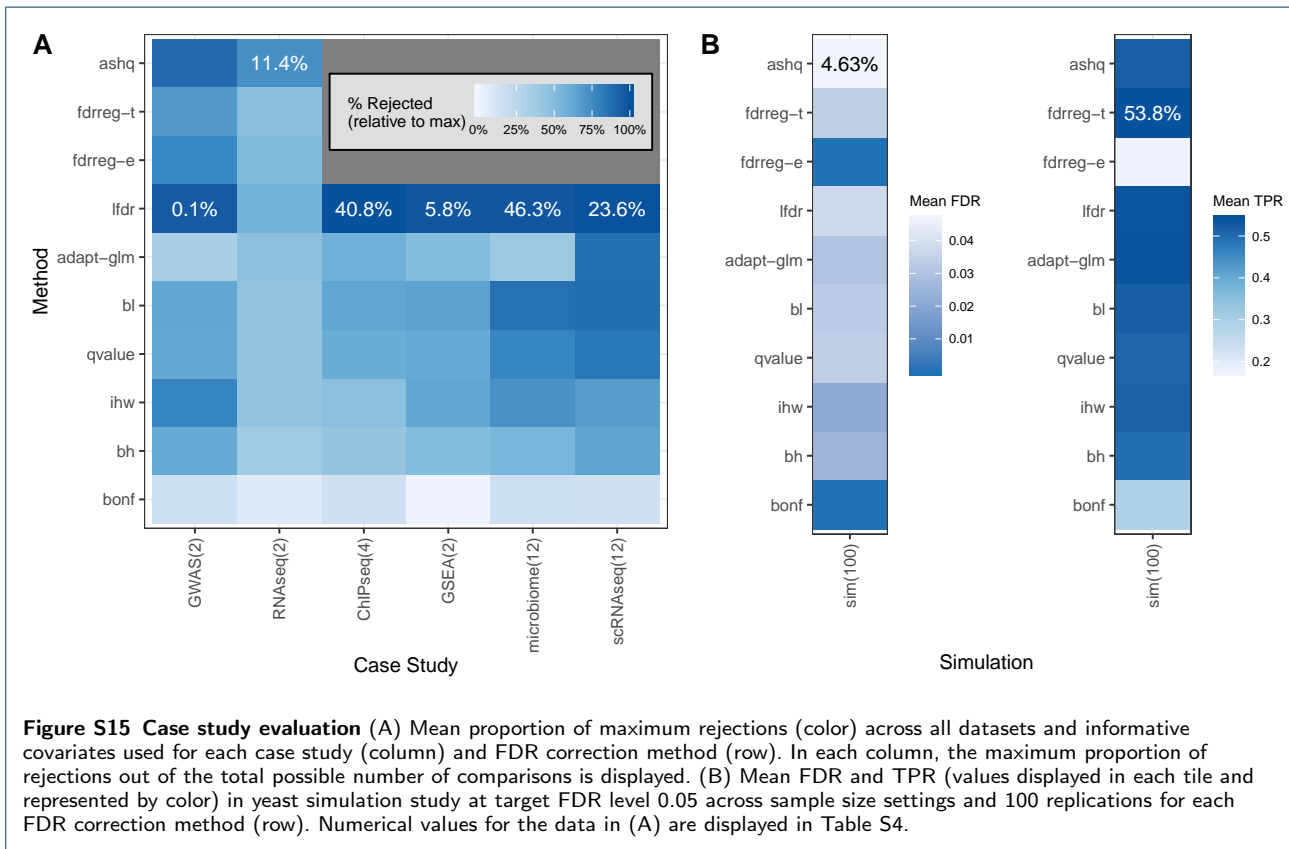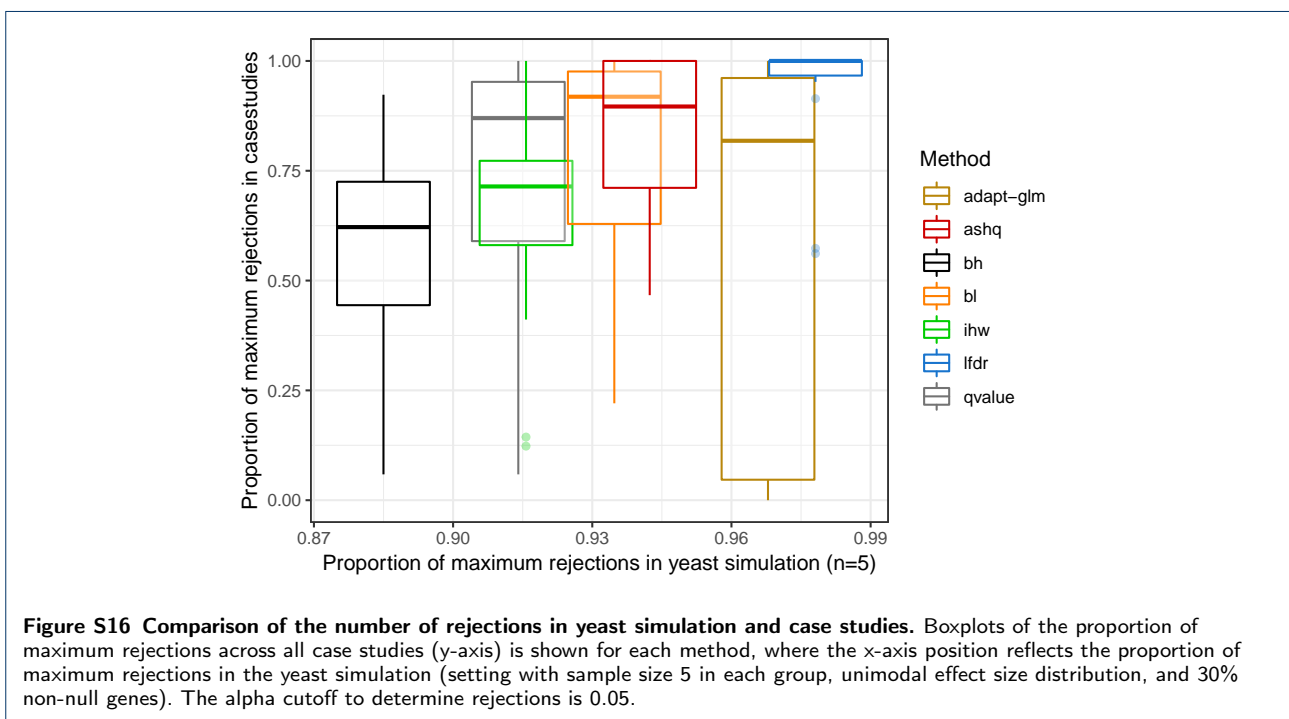





**Table S1** Approaches to adjust for multiple comparisons across hypothesis tests. The family-wise error rate (FWER) is the probability of at least one false discovery. The false discovery rate (FDR) is the expected fraction of false discoveries among all discoveries. FDR adjusted  $p$ -values are defined as adjusted  $p$ -values that have control FDR at nominal Type 1 error ( $\alpha$ ) level.  $\pi_0$  represents the proportion of null hypothesis tests.

| Control                      | Method                                        | Input                                         | Output                              | Two Groups Model                                           |                                             |                                                   |                                                                                                                                                                                                                                                                        | Description                                                                                                                                                                                                                                                                                                                                                | Availability (R)                                                                                                                                                                                                            |
|------------------------------|-----------------------------------------------|-----------------------------------------------|-------------------------------------|------------------------------------------------------------|---------------------------------------------|---------------------------------------------------|------------------------------------------------------------------------------------------------------------------------------------------------------------------------------------------------------------------------------------------------------------------------|------------------------------------------------------------------------------------------------------------------------------------------------------------------------------------------------------------------------------------------------------------------------------------------------------------------------------------------------------------|-----------------------------------------------------------------------------------------------------------------------------------------------------------------------------------------------------------------------------|
|                              |                                               |                                               |                                     | $x_i \sim \pi_{0,i} * f_{0,i} + (1 - \pi_{0,i}) * f_{1,i}$ | $x_i =$                                     | $\pi_{0,i} =$                                     | $f_{0,i} =$                                                                                                                                                                                                                                                            |                                                                                                                                                                                                                                                                                                                                                            |                                                                                                                                                                                                                             |
| FWER                         | Bonferroni correction [3, 4]                  |                                               | adjusted $p$ -values <sup>[1]</sup> | -                                                          | -                                           | -                                                 | -                                                                                                                                                                                                                                                                      | Robust to dependence, but very conservative                                                                                                                                                                                                                                                                                                                | package: stats<br>function(s): p.adjust                                                                                                                                                                                     |
| FDR                          | Benjamini-Hochberg Procedure (BH) [5]         | (1) $p$ -values                               | adjusted $p$ -values <sup>[1]</sup> | $p$ -value                                                 | equal across tests                          | equal across tests                                | equal across tests                                                                                                                                                                                                                                                     | First method proposed for controlling the FDR. More powerful than controlling FWER. However, previously shown to have sub-optimal power when the individual tests differ in statistical properties such as sample size, true effect size, signal-to-noise ratio or prior probability of being false [6].                                                   | package: stats<br>function(s): p.adjust                                                                                                                                                                                     |
|                              | Storey's $q$ -value [7]                       |                                               | $q$ -value <sup>[2]</sup>           | test statistic                                             |                                             |                                                   |                                                                                                                                                                                                                                                                        | Directly estimates $\pi_0$ . Increasingly more powerful than BH as $\pi_0$ decreases, while controlling FDR.                                                                                                                                                                                                                                               | package: qvalue<br>function(s): qvalue                                                                                                                                                                                      |
|                              | Independent Hypothesis Weighting (IHW) [6]    | (1) $p$ -values,<br>(2) independent covariate | adjusted $p$ -values                | $p$ -value                                                 | equal within covariate groups               | equal across tests                                | equal within covariate groups                                                                                                                                                                                                                                          | Weighted BH method to prioritize tests using data-derived weights computed for groups of tests binned according to an independent covariate. Does not calculate $\pi_{0,i}$ explicitly.                                                                                                                                                                    | package: ihw<br>function(s): ihw, adjust_pvalues                                                                                                                                                                            |
|                              | Boca and Leek Procedure (BL) [8]              |                                               | adjusted $p$ -values                | test statistic                                             | continuous (logistic) function of covariate | equal across tests                                | equal across tests                                                                                                                                                                                                                                                     | Weighted BH method to prioritize tests using data-derived weights computed using logistic regression with the independent covariate. Equivalent to Storey's $q$ -value in the case of no covariates.                                                                                                                                                       | package: swfdr<br>function(s): lm_pi0 <sup>[3]</sup>                                                                                                                                                                        |
|                              | Cai and Sun's Conditional Local FDR (lfd) [9] |                                               | adjusted $p$ -values                | test statistic                                             | equal within covariate groups               | equal within covariate groups                     | equal within covariate groups                                                                                                                                                                                                                                          | Modifies the standard two-group model by assuming known group structure and using different cutoffs for each group. FDR is controlled at different rates for each group to minimize the global false nondiscovery rate (FNR) subject to a constraint on the global FDR.                                                                                    | none <sup>[4]</sup>                                                                                                                                                                                                         |
|                              | AdaPT (adapt-glm) [10]                        |                                               | $q$ -values <sup>[5]</sup>          | $p$ -value                                                 | continuous (logistic) function of covariate | equal across tests                                | equal across tests                                                                                                                                                                                                                                                     | continuous density (exponential family), with parameter modeled as a continuous function (glm) of covariate                                                                                                                                                                                                                                                | Modifies the Barber-Candès procedure [11, 12] <sup>[6]</sup> by introducing an iterative, data-adaptive thresholding algorithm. The threshold depends on the covariate through the estimates of $\pi_{0,i}$ and $f_{1,i}$ . |
|                              | FDR Regression (FDRreg) (empirical) [13]      | (1) $z$ -scores,<br>(2) independent covariate | Bayesian FDRs                       | test statistic                                             | continuous (logistic) function of covariate | equal across tests                                | equal across tests                                                                                                                                                                                                                                                     | Modifies the standard two-group model by modeling the mixing proportions of the distributions for each test as a logistic function of an informative covariate (or spline expansion of the covariate). Assumes that the test statistics are normally distributed, with arbitrary mean and variance (empirical null) or standard normal (theoretical null). | package: FDRreg<br>function(s): FDRreg <sup>[8]</sup>                                                                                                                                                                       |
|                              | FDR Regression (FDRreg) (theoretical) [13]    |                                               | Bayesian FDRs                       | test statistic                                             | continuous (logistic) function of covariate | equal across tests                                | equal across tests                                                                                                                                                                                                                                                     | Modifies the standard two-group model by modeling the mixing proportions of the distributions for each test as a logistic function of an informative covariate (or spline expansion of the covariate). Assumes that the test statistics are normally distributed, with arbitrary mean and variance (empirical null) or standard normal (theoretical null). | package: FDRreg<br>function(s): FDRreg <sup>[8]</sup>                                                                                                                                                                       |
| Adaptive Shrinkage (ASH) [2] | (1) effect sizes,<br>(2) standard error       | $q$ -values <sup>[9]</sup>                    | effect size                         | equal across tests                                         | equal across tests                          | inversely proportional to power of standard error | Introduces the concept of the local false sign rate and $s$ -values for controlling errors across multiple tests. Same approach can also be used to compute $q$ -values and the local false discovery rate. Assumes that the distribution of effect sizes is unimodal. | package: ash<br>function(s): ash, get_qvalue                                                                                                                                                                                                                                                                                                               |                                                                                                                                                                                                                             |

<sup>[1]</sup>Formally, the BH approach does not generate adjusted  $p$ -values, but instead provides significance calls at a specified  $\alpha$  FDR cutoff. Adjusted  $p$ -values are commonly computed as the smallest FDR cutoffs at which each test would be called significant.

<sup>[2]</sup>The  $q$ -value is defined as the positive FDR (pFDR) analogue of the  $p$ -value. Approach can also be used to compute the local false discovery rate.

<sup>[3]</sup>Requires specification of a degrees of freedom parameter. Requires multiplying weights against BH adjusted  $p$ -values

<sup>[4]</sup>Custom implementation using fdrtools package (function: fdrtools). Requires manually specifying covariate groups, computing local fdr with fdrtools package, followed by custom code

<sup>[5]</sup> $q$ -value is defined as the minimum target FDR level such that the  $p$ -value is rejected. For hypotheses with  $p$ -values above the initial threshold value (default 0.45), the  $q$ -values are set to  $\infty$  because they are never rejected by adapt-glm for any  $\alpha$ .

<sup>[6]</sup>The Barber-Candès procedure estimates the false discovery proportion by quantifying the asymmetry in the distribution of  $p$ -values at a given threshold.

<sup>[7]</sup>adapt\_glm, adapt\_gam, and adapt\_glmnet are all wrappers around adapt that encode a specific assumption about the relationship between  $\pi(x)$  and  $\mu(x)$ . Requires manually specifying the models for these relationships with, e.g. splines package.

<sup>[8]</sup>Requires manually specifying model matrix with, e.g. splines package

<sup>[9]</sup>The method also returns local false sign rates, local false discovery rates, and  $s$ -values, where  $s$ -values are defined analogous to Storey's  $q$ -value, but with the local false sign rate rather than the local false discovery rate. Since the aim of our analysis was to compare methods for controlling the FDR, we only report results for the estimated  $q$ -values.

**Table S2** Yeast *in silico* experiment settings. The results from each series of simulations is reported as a separate Additional file in the supplementary materials, with the exception of the Null series, which is combined with the 'Unimodal Alternative, High  $\pi_0$ ' series. Both the 'Null' and 'Unimodal Alternative, High  $\pi_0$ ' series are also evaluated in the Polyester *in silico* experiments, and these results are provided as a separate separate file.

| Series                             | Non-null Effect Size Distribution <sup>[11]</sup> | Non-null Genes N(%) <sup>[12]</sup> | Covariate Strength <sup>[10]</sup> | Figures               | Additional File |
|------------------------------------|---------------------------------------------------|-------------------------------------|------------------------------------|-----------------------|-----------------|
| Null                               | –                                                 | 0                                   | –                                  | –                     | 2               |
| Unimodal Alternative, High $\pi_0$ | Unimodal                                          | 2000 ( $\approx 30\%$ )             | Strong<br>Weak<br>Uninformative    | S1, S15, S11, S3, S10 | 2               |
| Unimodal Alternative, Low $\pi_0$  | Unimodal                                          | 500 ( $\approx 7.5\%$ )             | Strong<br>Weak<br>Uninformative    | S3, S10               | 3               |
| Bimodal Alternative, High $\pi_0$  | Bimodal                                           | 2000 ( $\approx 30\%$ )             | Strong<br>Weak<br>Uninformative    | S3, S10               | 4               |
| Bimodal Alternative, Low $\pi_0$   | Bimodal                                           | 500 ( $\approx 7.5\%$ )             | Strong<br>Weak<br>Uninformative    | S3, S10               | 5               |

<sup>[10]</sup>In all cases, non-null genes were selected using probability weights sampled from a logistic function (where weights  $w(u) = \frac{1}{1+e^{-10u+5}}$ , and  $u \sim U(0,1)$ ). The strongly informative covariate  $X_s$  was equal to the logistic sampling weight  $w$ . The weakly informative covariate  $X_w$  was equal to the logistic sampling weight plus noise:  $w + \epsilon$ , where  $\epsilon \sim N(0, 0.25)$ , truncated such that  $X_w \in (0, 1)$ . The uninformative  $X_u$  covariate was unrelated to the sampling weights and drawn from a uniform distribution such that  $X_u \sim U(0, 1)$

<sup>[11]</sup>For unimodal alternative effect size distributions, the observed fold changes for the selected non-null genes in a non-null empirical comparison were used. For bimodal alternatives, observed test statistics  $z$  from an empirical non-null comparison were sampled with probability weights  $w(z) = f(|z|; \alpha, \beta)$ , where  $f$  is the Gamma probability density function (with shape and rate parameters  $\alpha = 4.5$  and  $\beta = 1 - 1e^{-4}$ , respectively). The corresponding effect sizes (fold changes,  $FC$ ) for ashq were calculated assuming a fixed standard error:  $FC = z\sigma_m$ , where  $\sigma_m$  is the median standard error of the  $\log_2$  fold change across all genes.

<sup>[12]</sup>Total number of genes considered (with mean expression across all samples greater than 1 raw count) is 6553. A small number of genes are removed from each replicate if DESeq2 does not return a  $p$ -value.

**Table S3** Simulation settings. The results from each series of simulations is reported as a separate Additional file in the supplementary materials.

| Series                                               | M                                            | Test Statistic Distribution                  | Effect Size Distribution                          | Marginal Null Proportion ( $\bar{\pi}_0$ ) | Covariate Relationship ( $p(x; \bar{\pi}_0)$ )                                                                          | Figures              |
|------------------------------------------------------|----------------------------------------------|----------------------------------------------|---------------------------------------------------|--------------------------------------------|-------------------------------------------------------------------------------------------------------------------------|----------------------|
| Null                                                 | 20000                                        | $N(0, 1)$<br>$t_{11}$<br>$t_5$<br>$\chi_4^2$ | –                                                 | 1.00                                       | –                                                                                                                       | –                    |
| Informative (cubic)                                  | 20000                                        | $N(0, 1)$<br>$t_{11}$<br>$t_5$<br>$\chi_4^2$ | $N(3, 1)$<br>$N(3, 1)$<br>$N(3, 1)$<br>$N(15, 1)$ | 0.90                                       | $p^{\text{cubic}}(x; \bar{\pi}_0)$                                                                                      | Figure S6, Figure S5 |
| Informative (step)                                   | 20000                                        | $N(0, 1)$<br>$t_{11}$<br>$t_5$<br>$\chi_4^2$ | $N(3, 1)$<br>$N(3, 1)$<br>$N(3, 1)$<br>$N(15, 1)$ | 0.90                                       | $p^{\text{step}}(x; \bar{\pi}_0)$                                                                                       | Figure S5            |
| Informative (sine)                                   | 20000                                        | $N(0, 1)$<br>$t_{11}$<br>$t_5$<br>$\chi_4^2$ | $N(3, 1)$<br>$N(3, 1)$<br>$N(3, 1)$<br>$N(15, 1)$ | 0.90                                       | $p^{\text{sine}}(x; \bar{\pi}_0)$                                                                                       | Figure S5            |
| Informative (cosine)                                 | 20000                                        | $N(0, 1)$<br>$t_{11}$<br>$t_5$<br>$\chi_4^2$ | $N(3, 1)$<br>$N(3, 1)$<br>$N(3, 1)$<br>$N(15, 1)$ | 0.90                                       | $p^{\text{cosine}}(x; \bar{\pi}_0)$                                                                                     | Figure S5            |
| Unimodal Effect Sizes                                | 20000                                        | $N(0, 1)$                                    | bimodal<br>spiky<br>flat-top<br>skewed            | 0.90                                       | $p^{\text{cubic}}(x; \bar{\pi}_0)$                                                                                      | Figure S7            |
| Unimodal Effect Sizes ( $t_{11}$ test statistics)    | 20000                                        | $t_{11}$                                     | bimodal<br>spiky<br>flat-top<br>skewed            | 0.90                                       | $p^{\text{cubic}}(x; \bar{\pi}_0)$                                                                                      | –                    |
| Unimodal Effect Sizes (25% non-null)                 | 20000                                        | $N(0, 1)$                                    | bimodal<br>spiky<br>flat-top<br>skewed            | 0.75                                       | $p^{\text{cubic}}(x; \bar{\pi}_0)$                                                                                      | Figure S8            |
| Varying M Tests                                      | 100<br>500<br>1000<br>5000<br>10000<br>50000 | $N(0, 1)$                                    | $N(3, 1)$                                         | 0.90                                       | $p^{\text{sine}}(x; \bar{\pi}_0)$                                                                                       | Figure S4C-D         |
| Varying Null Proportion                              | 20000                                        | $N(0, 1)$                                    | $N(2, 1)$                                         | 0.05<br>0.10<br>...<br>0.95<br>0.99        | $p^{\text{sine}}(x; \bar{\pi}_0)$                                                                                       | Figure S4E-F         |
| Varying Null Proportion ( $t_{11}$ test statistics)  | 20000                                        | $N(0, 1)$                                    | $N(2, 1)$                                         | 0.05<br>0.10<br>...<br>0.95<br>0.99        | $p^{\text{sine}}(x; \bar{\pi}_0)$                                                                                       | –                    |
| Varying Informativeness (continuous $p(x; \delta)$ ) | 20000                                        | $N(0, 1)$                                    | $N(2, 1)$                                         | 0.80                                       | $p^{\text{c-info}}(x; \delta = 0)$<br>$p^{\text{c-info}}(x; \delta = 5)$<br>...<br>$p^{\text{c-info}}(x; \delta = 100)$ | Figure S4A-B         |
| Varying Informativeness (discrete $p(x; \delta)$ )   | 20000                                        | $N(0, 1)$                                    | $N(2, 1)$                                         | 0.80                                       | $p^{\text{d-info}}(x; \delta = 0)$<br>$p^{\text{d-info}}(x; \delta = 5)$<br>...<br>$p^{\text{d-info}}(x; \delta = 100)$ | –                    |

**Table S4** Case Study results. For each case study and method, mean proportion of maximum number of rejections by any method at  $\alpha = 0.05$ , as shown in the left panel of Figure S15. Range is given in parentheses. A '-' indicates that the method was not applied to the specified case studies.

| Method    | GWAS             | RNA-seq          | ChIP-seq         | GSEA             | Microbiome       | scRNA-seq        |
|-----------|------------------|------------------|------------------|------------------|------------------|------------------|
| ashq      | 0.9 (0.79-1)     | 0.73 (0.47-1)    | -                | -                | -                | -                |
| fdrreg-t  | 0.69 (0.66-0.72) | 0.48 (0.42-0.55) | -                | -                | -                | -                |
| fdrreg-e  | 0.78 (0.71-0.84) | 0.52 (0.04-1)    | -                | -                | -                | -                |
| lfdr      | 0.96 (0.91-1)    | 0.57 (0.56-0.57) | 1 (1-1)          | 0.98 (0.95-1)    | 0.98 (0.96-1)    | 1 (0.96-1)       |
| adapt-glm | 0.34 (0-0.69)    | 0.47 (0.38-0.56) | 0.58 (0.19-0.93) | 0.5 (0-1)        | 0.41 (0-1)       | 0.87 (0.61-1)    |
| bl        | 0.64 (0.57-0.7)  | 0.45 (0.4-0.49)  | 0.64 (0.28-0.92) | 0.65 (0.51-0.79) | 0.78 (0.22-1)    | 0.88 (0.63-1)    |
| qvalue    | 0.63 (0.55-0.7)  | 0.44 (0.4-0.48)  | 0.61 (0.28-0.92) | 0.61 (0.48-0.75) | 0.7 (0.06-1)     | 0.84 (0.59-1)    |
| ihw       | 0.79 (0.73-0.84) | 0.45 (0.41-0.48) | 0.48 (0.12-0.82) | 0.63 (0.61-0.65) | 0.65 (0.34-0.92) | 0.68 (0.5-0.78)  |
| bh        | 0.62 (0.54-0.69) | 0.39 (0.38-0.4)  | 0.44 (0.06-0.82) | 0.5 (0.44-0.55)  | 0.53 (0.04-0.92) | 0.64 (0.45-0.77) |
| bonf      | 0.17 (0.15-0.18) | 0.08 (0.04-0.11) | 0.16 (0-0.32)    | 0 (0-0)          | 0.16 (0-0.46)    | 0.16 (0.07-0.23) |

## 1 Supplementary *in silico* experiment results

Here we summarize the benchmarking results of `fdrrreg-e`, which was excluded from the main results due to its unstable and often inferior performance compared to its counterpart `fdrrreg-t`. The difference between these two implementations of FDRreg is that `fdrrreg-t` assumes the null distribution of test statistics is standard normal, while `fdrrreg-e` estimates the null distribution of test statistics empirically. We find this estimation procedure to be sensitive to settings of the distribution of effect sizes and proportion of non-null tests in particular.

### 1.1 Summary of `fdrrreg-e` performance

We found that while modern FDR methods generally led to a higher true positive rate (TPR), or power, in the *in silico* experiments and simulations, `fdrrreg-e` was sometimes as conservative as the Bonferroni correction (Figure S3). The increase in TPR of `fdrrreg-e` sometimes showed substantial improvement over modern methods in several simulation settings (Figures S3, S4, S5, S6, S7, S8). However, these gains were often accompanied by a lack of FDR control, highlighting the sensitivity of `fdrrreg-e` to underlying model assumptions.

#### 1.1.1 Number of tests

We observed that the FDR control of `fdrrreg-e` was sensitive to the number of tests in simulation. Specifically, FDR was substantially inflated when `fdrrreg-e` was applied to fewer than 1,000 tests (Figure S4C). FDR control generally improved as the number of tests increased.

#### 1.1.2 Proportion of non-null tests

The performance of `fdrrreg-e` was particularly sensitive to extreme changes in the proportion of non-null tests. In simulations, `fdrrreg-e` exhibited inflated FDR when the proportion of non-null hypotheses was near 50% (Figure S4E), and suffered from low TPR when there were more than 20% non-null hypotheses, excluding settings where the FDR was not controlled (Figure S4F). In the yeast *in silico* experiments, we also observed that `fdrrreg-e` was more conservative when the proportion of non-null genes was 30% compared to when it was 7.5% (Figure S3). Similar results were also observed in a series of simulations where unimodal effect sizes were used when the proportion of non-null tests was increased from 10% (Figure S7) to 25% (Figure S8).

#### 1.1.3 Distribution of test statistics

We observed that the performance of `fdrrreg-e` declined when the normality assumption of the test statistic was violated (Figure S6B-C). FDR was considerably inflated when it was applied to  $t$ -distributed test statistics. As expected, the increase in FDR was greater for the heavier-tailed  $t$  distribution with fewer degrees of freedom (Figure S6B).

#### 1.1.4 Distribution of effect sizes

In addition to distributional assumptions on the test statistic, empirical FDRreg requires distributional assumptions on the effect size. Specifically, the empirical null framework used in `fdrrreg-e` relies on [14] to estimate the distribution of null test statistics which requires that all test statistics with values near zero are null, referred to as the ‘zero assumption’. If this is not true, as is the case when the effect sizes are unimodal, the estimation of the null distribution is unidentifiable and may become overly wide, resulting in conservative behavior.

To investigate the sensitivity of these methods to the distribution of effect sizes, multiple distributions of the effect sizes were considered in both yeast *in silico* experiments and simulations. Both unimodal effect size distributions and those following the assumption of `fdrrreg-e`, with most non-null effects greater than zero (Figure S6A), were considered. While most simulations included the latter, simulations were also performed with a set of unimodal effect size distributions described in [2] (Figure S7 and S8). In the yeast *in silico* experiments, two conditions were investigated - a unimodal and a bimodal case.

As expected, we observed that when the zero assumption of empirical FDRreg is violated, `fdrrreg-e` was more conservative in both the yeast *in silico* experiments (Figure S3) and in simulation (Figures S7 and S8).

We also note that while it is simple to check distributional assumptions on the overall distribution of test statistics or effect sizes, in practice it is impossible to check the distributional assumptions of empirical FDRreg under the alternative, since they rely on knowing which tests are non-null.

## 2 Supplementary case study results

To illustrate what types of covariates may be informative in controlling the FDR in different computational biology contexts, we compared the methods using six case studies including genome-wide association testing (Section 2.1), gene set analysis (Section 2.2), detecting differentially expressed genes in bulk RNA-seq (Section 2.3) and single-cell RNA-seq (Section 2.4), differential binding in ChIP-seq (Section 2.5), and differential abundance testing in the microbiome (Section 2.6). Here we provide additional results for each case study to complement the summary provided in the main text. For full details of the analyses and results, refer to Additional files 21-41.

### 2.1 Case-study: Genome-Wide Association Studies

Genome-Wide Association Studies (GWAS) are typically carried out on large cohorts of independent subjects in order to test for association of individual genetic variants with a phenotype. The genetic variants are generally measured using microarrays containing probes for up to several million Single Nucleotide Polymorphisms (SNPs). These SNP probes target single base-pair DNA sites that have been shown to vary across a population. To boost power, meta-analyses of GWAS group together many studies, commonly including hundreds of thousands to millions of SNPs, with heterogeneous effect sizes and a wide range of sample size at each loci.

We analyzed a GWAS experiment that carried out a meta-analysis of hundreds of thousands of individuals for more than two million SNPs for association of genetic variants with Body Mass Index (BMI) [15]. As informative covariates, we considered (1) the minor allele frequency (MAF), or the proportion of the population which exhibits the less common allele, and (2) the number of samples for which each SNP was tested for association in the corresponding meta-analysis. In total, 196,969 approximately independent SNPs (out of 2,456,142) were included in the FDR analysis.

For each covariate, we examined whether its rank was associated with the  $p$ -value distribution. As expected, larger values of the sample size resulted in an enrichment for smaller  $p$ -values. Additionally, intermediate values of the MAF were associated with an enrichment for smaller  $p$ -values. This is expected since an MAF near 0.5 balances the number of samples with each allele, thereby maximizing power to detect a difference. For both covariates, the distribution of moderate to large  $p$ -values appeared uniform and independent of the value of the covariate. For methods that include a covariate, similar numbers of SNPs were rejected at the 0.05 level for either covariate.

For both informative covariates, we found `lfd`, `ihw`, and `fdr-e` rejected the largest number of hypotheses, followed by `fdr-t`. The sample size covariate appeared to be more informative than MAF for `lfd` and `ihw`, as both methods rejected more than `ashq`, whereas `ashq` found more discoveries than all covariate-aware methods that used MAF. Neither covariate seemed to be very informative for `bl`, as it did not have much gain over `bh` or `qvalue`. `adapt-glm` was more conservative than Bonferroni with the MAF covariate, but was ranked above `bl` using the sample size covariate. The overlap among the methods was high, with the largest set sizes containing SNPs rejected by all methods except Bonferroni and/or `adapt-glm` for both covariate comparisons. The next largest set size was the SNPs rejected by `ashq` exclusively.

### 2.2 Case-study: Gene set analyses

Gene set analysis is commonly used to provide insights to results of differential expression analysis. These methods aim to identify gene sets such as Gene Ontology (GO) categories or biological pathways that exhibit a pattern of differential expression. One class of methods, called overrepresentation approaches, test each gene set for a higher number of differentially expressed genes than expected by chance [16]. Another class of methods, called functional class scoring approaches, test each gene set for a coordinated change in expression [16]. While the former operates on a list of differentially expressed genes and does not consider the magnitude or direction of effect, the latter uses information from all genes, and can even detect small coordinated changes across many genes that are not significantly DE individually. We investigated the use of an informative covariate in `GOseq` [17], an overrepresentation test, as well as Gene Set Enrichment Analysis (GSEA) [18], a functional class scoring approach. Since the sizes of gene sets differ substantially and these size differences translate into differences in power, we hypothesized that multiple-testing correction in gene set analysis would benefit from methods that incorporate information about set sizes.

We used two RNA-seq datasets that investigated gene expression changes (1) between cerebellum and cerebral cortex [19] and (2) upon differentiation of hematopoietic stem cells (HSCs) into multipotent progenitors (MPP) [20]. We obtained 9,853 and 1,336 differentially expressed genes with FDR below 0.10 (using BH) for the human

and mouse datasets, respectively. We observed that for both GSEA and GSeq larger gene sets were more likely to have smaller  $p$ -values than smaller gene sets. Thus, the covariate was informative. In addition, the covariate appeared to be independent under the null hypothesis for GSEA, as evaluated by the histogram of  $p$ -values stratified by gene set size bins. However, upon evaluation of the stratified histograms of GSeq  $p$ -values, we observed that the distribution of  $p$ -values in the larger range was quite different for different covariate bins. This suggests that gene set size is not independent under the null hypothesis for GSeq, so the assumptions of methods which use an independent covariate are violated. Thus, we do not include the GSeq method in the benchmarking study and instead proceed with GSEA  $p$ -values only.

In this case study, we excluded the methods `fdrreg-e`, `fdrreg-t`, and `ashq` since they require standard errors and test statistics that GSEA does not provide. Overall `lfdr`, `bl`, and `ihw` rejected more hypotheses compared to the other methods. However, the ranking among these methods was not the same between the different datasets. For the mouse dataset, `lfdr` found the most rejections at smaller  $\alpha$  levels (less than 0.05), but `adapt-glm` found the most at higher  $\alpha$  levels. This was followed by `BL`, `qvalue`, and then `IHW`. For the human dataset, `lfdr` found the most rejections at all  $\alpha$  levels, followed by `IHW` and then `BL`, and `adapt-glm` was more conservative than `BH` for almost all  $\alpha$  levels. As expected, performance using the random (uninformative) covariate of `BL` and `IHW` was almost identical to `qvalue` and `BH`, respectively. However, the `adapt-glm` using the uninformative covariate was quite different in the two datasets, with no rejections in the human, and more rejections than any other method in the mouse (at  $\alpha > 0.05$ ).

### 2.3 Case-study: Differential gene expression in bulk RNA-seq

High-throughput sequencing of mRNA molecules has become the standard for transcriptome profiling. A central analysis task is to determine which genes are differentially expressed between two biological conditions. Statistical models have been established to address this question including `DESeq2` [21] and `edgeR` [22]. These methods return per gene  $p$ -values that are further adjusted for multiple testing, typically using the Benjamini-Hochberg procedure.

We assessed the performance of modern FDR methods in the context of differential expression on two RNA-seq datasets. The first dataset consisted of two tissues of 10 individuals from the *GTEX* project and the second dataset consisted of a mouse knockdown experiment of the microRNA *mir200c*. For FDR methods that can use an informative covariate, we used mean expression across samples. We confirmed that this covariate was indeed informative for both datasets.

For the *GTEX* dataset, `ashq` found more rejections than any other method. At a FDR of 10%, the number of rejections of `ashq` was more than twice the number of rejections from any of rest of the methods, and the largest gene set was the set of genes found by `ashq` and no other methods. Following `ashq`, `lfdr`, `adapt-glm`, and `fdrreg-t` performed similarly. `bl` found almost the same number of rejections as `qvalue`, and `ihw` found slightly more than `bh`. `fdrreg-e` was as conservative as Bonferroni. The ranking of the methods based on the number of rejections was consistent across different strata of the covariate.

For the *mir200c* dataset the ranking of the methods was very different compared to the *GTEX* dataset. Here, `fdrreg-e` found the most rejections by far, and the largest gene set was the set of genes found by `fdrreg-e` and no other methods. The next highest ranking methods were `lfdr`, `ihw`, and `ashq`, followed by `bl`, `qval`, `bh`, `fdrreg-t`, and `adapt-glm` which all performed similarly. For this dataset, the ranking of methods changed substantially across strata of the covariate. For example, among the hypothesis falling between the 50th and 75th percentile of the covariate, `lfdr` was ranked second (the next highest ranked method after `fdrreg-e`) but among the hypothesis between the 75th and 100th percentile of the covariate, `ashq` was ranked second.

### 2.4 Case-study: Differential gene expression in single-cell RNA-seq

Over the past 5 years, breakthroughs in microfluidics and droplet-based RNA capture technologies have made it possible to sequence the transcriptome of individual cells rather than populations of cells. Quantification of single-cell RNA-seq (scRNA-seq) reads results in a matrix of counts by cells for each sample. The primary applications of scRNA-seq have been in describing cellular heterogeneity in primary tissues, differences in cellular heterogeneity in disease, and discovery of novel cell subpopulations. Differential gene expression of scRNA-seq is used to determine gene sets which distinguish cell populations within the same biological condition, and between cell populations in different samples or conditions.

In this case-study, we examined differences in gene expression in two different biological systems. First, we detected differentially expressed genes between neoplastic glioblastoma cells sampled from a patient's tumor core

with those sampled from nearby peripheral tissue [23]. In addition, we also detected differentially expressed genes between murine macrophage cells that were stimulated to produce an immune response with an unstimulated population [24]. We carried out differential expression analyses using two different methods developed for scRNA-seq: scDD [25] and MAST [26], as well as the Wilcoxon Rank-Sum test.

We examined the mean nonzero expression and detection rate (defined as the proportion of cells expressing a given gene) as potentially informative covariates. For both datasets and all three differential expression methods, we found that mean nonzero expression and detection rate were both informative and approximately independent under the null hypothesis, satisfying the conditions for suitability of inclusion as an informative covariate for controlling FDR. All methods returned more rejections of genes with high nonzero mean and detection rate. They also tended to slightly favor genes with extremely low detection rate.

Across datasets, covariates, and differential expression tests, lfr usually found the most rejections, followed by bl and adapt-glm. However, at smaller  $\alpha$  values, adapt-glm was one of the most conservative methods. The ihw and qvalue methods were next, with their rank dependent the dataset and differential expression test used. While a gain in rejections for ihw over bh was apparent in the human dataset, the performance of ihw was very similar to bh in the mouse dataset.

### 2.5 Case-study: Differential binding in ChIP-seq

ChIP-seq has been widely used to detect protein binding regions and histone modifications in DNA. Testing difference of ChIP-seq signals between conditions usually contains two steps: firstly, defining sets of regions for which the ChIP-seq coverage are quantified; secondly, comparing quantified coverages for testing the statistical significance of differential binding regions. In the first step, regions can be defined by peak calling from samples, based on their signal in sliding windows [27], or by *a priori* interest. In this study we benchmarked results from the latter two approaches by analyzing H3K4me3 data from two widely studied cell lines. Because H3K4me3 is an active marker of gene expression, its signal is most active in promoter regions. This allowed us to pursue an analysis of promoters as regions of interest. We also benchmark the results using the sliding window approach csaw to define *de novo* regions on the H3K4me3 dataset as well as an additional dataset comparing CREB protein binding (CRB) in wild-type versus knock-out mice. We exclude ashq and FDRreg methods from the sliding window analyses since csaw does not provide a standard error or test statistic.

Based on observations that differentially bound peaks tend to have higher coverage, we investigated the use of mean coverage as an informative covariate. In the promoter analysis, the  $p$ -value histograms showed that high coverage groups are more highly enriched for significant  $p$ -values different, suggesting mean coverage is an informative covariate. Likewise, we observed that wider windows in the *de novo* analysis tend to have more significant  $p$ -values. The distribution of  $p$ -values under the null in both cases appeared approximately uniform.

In the promoter analysis, ashq detected the highest number of differential binding regions by far, followed by lfr, fdrreg-t, bl, qvalue, and adapt-glm, which all performed similarly. In the sliding window analyses, lfr rejected the most hypotheses in both datasets, followed by adapt-glm, bl, and qvalue, which performed similarly to one another. In both datasets, the next lowest methods were ihw and bh, where the advantage of ihw only observed in the CBP csaw analysis. Finally, fdrreg-e was more conservative than Bonferroni in the promoter analysis.

### 2.6 Case-study: Differential abundance testing and correlations in microbiome data analysis

16S rRNA sequencing provides an overview of the microbial community in a given sample, and is a common and accessible way to identify relationships between microbial communities and phenotypes of interest. For example, differential abundance testing is often used to identify bacterial taxa which are enriched or depleted in a disease state, and non-parametric correlations between taxa abundances and phenotypes can be calculated when phenotypes of interest are continuous (e.g. body mass index). However, 16S rRNA datasets are high-dimensional, noisy, and sparse, and biological effects can be weak, complicating many statistical analyses and limiting power to detect true associations [28, 29]. Furthermore, environmental samples tend to have many thousands of taxa, which further complicates our ability to identify significant associations

We performed differential abundance tests on the OTU and genus levels for three different datasets from the microbiomeHD database: (1) obesity, where we do not expect a large disease-associated signal [28, 30], (2) inflammatory bowel disease (IBD), which seems to have an intermediate number of disease-associated bacteria [31, 32], and (3) infectious diarrhea (Clostridium difficile (CDI) and non-CDI), where the disease-associated signal is very strong [32, 33]. We also performed Spearman correlation tests between OTU relative abundances



and the respective values of three geochemical variables, measured from wells from a contaminated former S-3 waste disposal site in the Bear Creek watershed in Oak Ridge, Tennessee, part of the Department of Energy's Oak Ridge Field Research Center [34]. The geochemical variables were chosen based on their ability to be predicted by the microbial community in [34]: pH, Al, and SO<sub>4</sub>, where we expect strong, intermediate, and weak associations with the microbial abundances, respectively.

We examined the ubiquity (defined as the proportion of samples with non-zero abundance of each taxa) and mean non-zero abundance of taxa as potentially informative covariates. We found that ubiquity was informative and approximately independent under the null hypothesis, satisfying the conditions for suitability of inclusion as an informative covariate for controlling FDR. Mean non-zero abundance appeared less informative than ubiquity, as it typically showed a less striking pattern in diagnostic plots of  $p$ -values by covariate value.

OTU-level differential abundance analyses did not have sufficient power to detect any significant differences in the IBD, CRC, and obesity datasets. Similarly, no OTUs correlated with SO<sub>4</sub> levels and ubiquity was not informative in this case. In addition, very few rejections were found in the CRC dataset at the genus level. Consequently, ubiquity was not informative in these “null” analyses and almost all FDR-correction methods found no significant associations. These “null” results are excluded from the results in the main text.

For the other analyses (genus-level differential abundance, OTU-level differential abundance in diarrhea, OTU-level correlation analyses for pH and Al), ubiquity was informative and the FDR-correction methods which incorporated this information tended to recover more significant associations than naive methods. When there were enough tests for it to be applied, lfr typically found the most rejections. This was usually followed by bl and qvalue, with the gain of bl over qvalue variable by dataset. In the correlation analyses, however, ihw found more rejections than bl and qvalue. The performance of adapt-glm was usually highly variable, both within a dataset and across datasets: it either had a very different ranking at different  $\alpha$  levels (obesity), found the among the most rejections (correlation of pH), or found no rejections at all (IBD, CRC). In cases with very few tests (e.g. genus-level analyses), ihw used only 1 covariate bin and reduced to bh as expected.

## References

1. Soneson C, Robinson MD. iCOBRA: open, reproducible, standardized and live method benchmarking. *Nature Methods*. 2016;13(4):283.
2. Stephens M. False discovery rates: a new deal. *Biostatistics*. 2016;18:275–294.
3. Dunn OJ. Multiple comparisons among means. *Journal of the American Statistical Association*. 1961;56(293):52–64.
4. Bonferroni CE. Teoria statistica delle classi e calcolo delle probabilità. *Publicazioni del R Istituto Superiore di Scienze Economiche e Commerciali di Firenze*. 1936;8:3–62.
5. Benjamini Y, Hochberg Y. Controlling the false discovery rate: a practical and powerful approach to multiple testing. *Journal of the Royal Statistical Society Series B*. 1995;p. 289–300.
6. Ignatiadis N, Klaus B, Zaugg JB, Huber W. Data-driven hypothesis weighting increases detection power in genome-scale multiple testing. *Nature Methods*. 2016;13:577–580.
7. Storey JD. A direct approach to estimating false discovery. *Journal of the Royal Statistical Society Series B*. 2002;64(3):479–498.
8. Boca SM, Leek JT. A direct approach to estimating false discovery rates conditional on covariates. *BioRxiv*. 2017; Available from: <https://doi.org/10.1101/035675>.
9. Cai TT, Sun W. Simultaneous testing of grouped hypotheses: Finding needles in multiple haystacks. *Journal of the American Statistical Association*. 2009;104:1467–1481.
10. Lei L, Fithian W. AdaPT: an interactive procedure for multiple testing with side information. *Journal of the Royal Statistical Society: Series B*. 2018;80:649–679.
11. Barber RF, Candès EJ, et al. Controlling the false discovery rate via knockoffs. *The Annals of Statistics*. 2015;43(5):2055–2085.
12. Arias-Castro E, Chen S, et al. Distribution-free multiple testing. *Electronic Journal of Statistics*. 2017;11(1):1983–2001.
13. Scott JG, Kelly RC, Smith MA, Zhou P, Kass RE. False discovery rate regression: an application to neural synchrony detection in primary visual cortex. *Journal of the American Statistical Association*. 2015;110:459–471.
14. Efron B. Microarrays, Empirical Bayes and the Two-Groups Model. *Statistical Science*. 2008;23(1):1–22.
15. Speliotes EK, Willer CJ, Berndt KL, S I Monda, Thorleifsson G, Jackson AU, Allen CM, H L Lindgren, et al. Association analyses of 249,796 individuals reveal 18 new loci associated with body mass index. *Nature Genetics*. 2010;42(11):937–948.
16. Mathur R, Rotroff D, Ma J, Shojaie A, Motsinger-Reif A. Gene set analysis methods: a systematic comparison. *BioData Mining*. 2018;11(1):8.
17. Young MD, Wakefield MJ, Smyth GK, Oshlack A. Gene ontology analysis for RNA-seq: accounting for selection bias. *Genome Biology*. 2010;11(2):R14. Available from: <http://dx.doi.org/10.1186/gb-2010-11-2-r14>.
18. Sergushichev A. An algorithm for fast preranked gene set enrichment analysis using cumulative statistic calculation. *BioRxiv*. 2016; Available from: <https://doi.org/10.1101/060012>.
19. Mele M, Ferreira PG, Reverter F, DeLuca DS, Monlong J, Sammeth M, et al. The human transcriptome across tissues and individuals. *Science*. 2015 May;348(6235):660665. Available from: <http://dx.doi.org/10.1126/science.aaa0355>.
20. Cabezas-Wallscheid N, Klimmeck D, Hansson J, Lipka D, Reyes A, Wang Q, et al. Identification of Regulatory Networks in HSCs and Their Immediate Progeny via Integrated Proteome, Transcriptome, and DNA Methylome Analysis. *Cell Stem Cell*. 2014 Oct;15(4):507522. Available from: <http://dx.doi.org/10.1016/j.stem.2014.07.005>.
21. Love MI, Huber W, Anders S. Moderated estimation of fold change and dispersion for RNA-seq data with DESeq2. *Genome Biology*. 2014;15(12):550.
22. Robinson MD, McCarthy DJ, Smyth GK. edgeR: a Bioconductor package for differential expression analysis of digital gene expression data. *Bioinformatics*. 2009 Nov;26(11):139140. Available from: <http://dx.doi.org/10.1093/bioinformatics/btp616>.
23. Darmanis S, Sloan SA, Croote D, Mignardi M, Chernikova S, Samghababi P, et al. Single-Cell RNA-Seq Analysis of Infiltrating Neoplastic Cells at the Migrating Front of Human Glioblastoma. *Cell Reports*. 2017;21(5):1399–1410.

24. Lane K, Van Valen D, DeFelice MM, Macklin DN, Kudo T, Jaimovich A, et al. Measuring Signaling and RNA-Seq in the Same Cell Links Gene Expression to Dynamic Patterns of NF- $\kappa$ B Activation. *Cell Systems*. 2017;4(4):458–469.
25. Korthauer KD, Chu LF, Newton MA, Li Y, Thomson J, Stewart R, et al. A statistical approach for identifying differential distributions in single-cell RNA-seq experiments. *Genome Biology*. 2016;17(1):222.
26. Finak G, McDavid A, Yajima M, Deng J, Gersuk V, Shalek AK, et al. MAST: a flexible statistical framework for assessing transcriptional changes and characterizing heterogeneity in single-cell RNA sequencing data. *Genome Biology*. 2015;16(1):278.
27. Lun AT, Smyth GK. csaw: a Bioconductor package for differential binding analysis of ChIP-seq data using sliding windows. *Nucleic Acids Research*. 2015;44(5):e45–e45.
28. Sze MA, Schloss PD. Looking for a Signal in the Noise: Revisiting Obesity and the Microbiome. *mBio*. 2016;7(4):e01018–16.
29. Paulson JN, Stine OC, Bravo HC, Pop M. Differential abundance analysis for microbial marker-gene surveys. *Nature Methods*. 2013;10(12):1200–1202.
30. Goodrich JK, Waters JL, Poole AC, Sutter JL, Koren O, Blehman R, et al. Human Genetics Shape the Gut Microbiome. *Cell*. 2014;159(4):789–799.
31. Papa E, Docktor M, Smillie C, Weber S, Preheim SP, Gevers D, et al. Non-Invasive Mapping of the Gastrointestinal Microbiota Identifies Children with Inflammatory Bowel Disease. *PLoS ONE*. 2012;7(6):e39242.
32. Duvallet C, Gibbons SM, Gurry T, Irizarry RA, Alm EJ. Meta-analysis of gut microbiome studies identifies disease-specific and shared responses. *Nature Communications*. 2017;8(1).
33. Schubert AM, Rogers MAM, Ring C, Mogle J, Petrosino JP, Young VB, et al. Microbiome Data Distinguish Patients with Clostridium difficile Infection and Non-C. difficile-Associated Diarrhea from Healthy Controls. *mBio*. 2014;5(3):e01021–14–e01021–14.
34. Smith MB, Rocha AM, Smillie CS, Olesen SW, Paradis C, Wu L, et al. Natural Bacterial Communities Serve as Quantitative Geochemical Biosensors. *mBio*. 2015;6(3):e00326–15.
